# Supplementary material for: Effects of proactive vs fixed community health care delivery on child health and access to care: a cluster randomised trial secondary endpoint analysis
Source: PubMed Central journal article supplement (PMC10122537; doi:10.7189/jogh.13.04047), 2023-04-21
Supplement: jogh-13-04047-s001.pdf [file jogh-13-04047-s001.pdf]

## **Online Supplementary Document**

### **Supplementary Tables/Figures**

Figure S1: Timeline cluster graphical tool

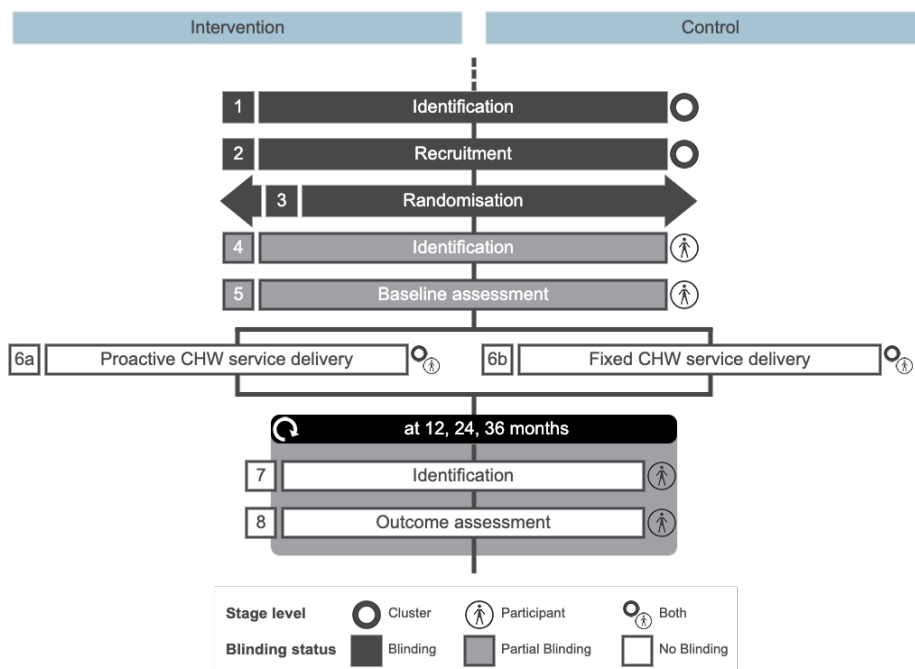

### 1 Identification

Seven contiguous PHC catchment areas (of 22) in the Bankass health district are chosen by the implementing organization's leadership and trial PIs in partnership with the Malian Ministry of Health and Social Affairs (MSDS), based on high under-five mortality and low health-care utilization, few concurrent health interventions, and availability of local health authorities to collaborate.

### 2 Recruitment

The intervention implementation team holds public consultation meetings with community representatives from each PHC catchment area, including village chiefs and their advisors, leaders of women's and youth associations, religious leaders, mayors and other politico-administrative officials, PHC directors and community health associations. Verbal permission to conduct the trial is obtained at these meetings.

### 3 Randomisation

Based on an initial geo-mapping, villages and hamlets one kilometre or less apart are grouped into clusters. Clusters are randomised in a 1:1 allocation and assigned to treatment arms by a trial statistician not involved in implementation or the identification of participants. Randomisation is stratified on PHC catchment area and distance to nearest PHC. In total, there are 21 strata. Each of the seven catchment areas has three strata: one for the cluster where the PHC is located, one for clusters within five kilometres from the PHC, and one for clusters beyond five kilometres.

### 4 Identification

The entire cluster is studied. An initial enumeration identifies all family compounds in each cluster. Four-digit identifiers are assigned and displayed at the entrance to each family compound, starting with the village chief (0001). All permanent residents are enrolled in a population census at a subsequent field visit, when baseline assessors collect household roster and socio-economic information within each family compound. Open Data Kit is programmed to identify, in real-time, women in the household roster to be routed through an eligibility module, where screening against the inclusion criteria and consent to participate in the women's survey is obtained. Overall study objectives and design, including the randomisation procedure, are discussed with assessors during their training and with participants during informed consent. Although there is no explicit disclosure of allocation to either actor, it is not possible to know for sure whether allocation concealment is achieved at this stage.

### 5 Baseline assessment

Reproductive, maternal, newborn, and child health service utilisation outcomes are assessed at baseline with the women's survey that collects self-reported data. Although there is no explicit disclosure of allocation to either assessors or participants, it is not possible to know for sure whether allocation concealment is achieved at this stage.

### 6a Intervention delivery

Comprehensive community-based primary care services are provided by professionalised CHWs in every cluster, at a CHW:population ratio of approximately 1:700. Small clusters that have a population of less than 200 people and a neighbouring cluster allocated to the same treatment arm located less than three kilometres away, and without other geographical or language barriers separating the two, are assigned the same CHW (N=5 intervention cluster pairs). In the intervention arm, CHWs deliver services using a proactive approach: CHWs conduct door-to-door proactive case-finding home visits for at least two hours per day, six days per week, with the goal of visiting every household at least twice per month. Given the nature of the intervention, blinding of participants and study implementers to allocation is not possible. Dedicated CHW supervisors provide individual, monthly supervision to CHWs in both arms. PHCs that serve both arms are reinforced in physical infrastructure, equipment, stocks, and supplies, as well as in qualified personnel and training in primary care. User fees are removed for CHW and PHC care, and at higher levels of care for referred patients.

### 6b Comparison delivery

Comprehensive community-based primary care services are provided by professionalised CHWs in every cluster, at a CHW:population ratio of approximately 1:700. Small clusters that have a population of less than 200 people and a neighbouring cluster allocated to the same treatment arm located less than three kilometres away, and without other geographical or language barriers separating the two, are assigned the same CHW (N=6 control cluster pairs). In the control arm, CHWs deliver services using the conventional, passive approach: CHWs provide care at community health sites for at least four hours per day, six days per week, to care-seeking patients. Given the nature of the intervention, blinding of participants and study implementers to allocation is not possible. Dedicated CHW supervisors provide individual, monthly supervision to CHWs in both arms. PHCs that serve both arms are reinforced in physical infrastructure, equipment, stocks, and supplies, as well as in qualified personnel and training in primary care. User fees are removed for CHW and PHC care, and at higher levels of care for referred patients.

### 7 Identification

New entrants to the cluster are studied. The population census is updated at each annual follow-up data collection, capturing births and deaths, and permanent in- and out-migration to the study area. Newly eligible women, including those who have turned 15 years old or have married into the area in the interim period, are identified and passed through the screening module. Women who were enrolled in a previous annual survey are asked to participate in follow-up surveys even if they have aged beyond 49 years. Given the nature of the ongoing intervention, blinding of assessors and participants to allocation is not possible.

### 8 Outcome assessment

The trial primary endpoint, under-five mortality, is assessed with the self-reported lifetime birth history in the women's survey at each follow-up. Child health and service utilisation outcomes are assessed with mother's two-week recall for each of her co-residing, living children under five at each survey time-point. Given the nature of the ongoing intervention, blinding of assessors and participants to allocation is not possible. Statisticians are blind to allocation throughout the trial (after step 3) until the dataset is fully cleaned and locked and the randomisation assignment is provided by the DSMB.

Figure S2: Trial profile

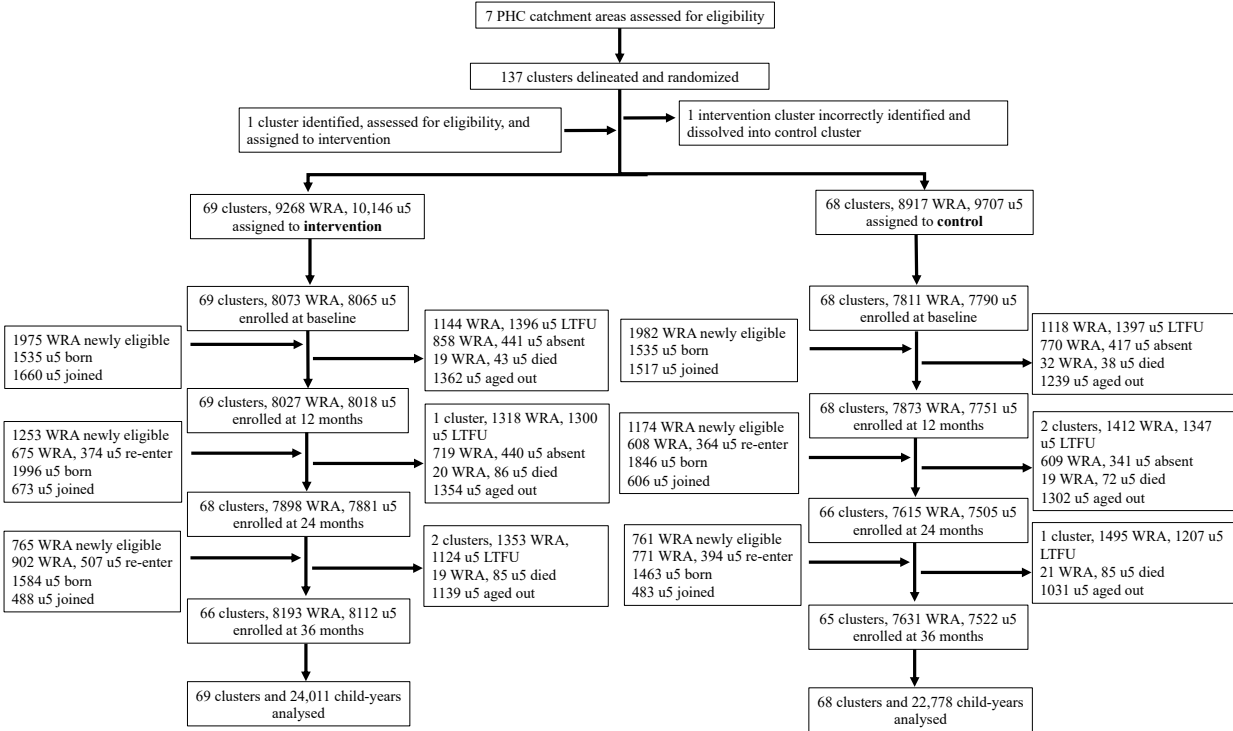

Notes: Following randomisation, an additional eligible cluster was identified and assigned to the intervention arm, the same arm as its nearest neighbour. A neighbourhood within a control arm cluster was wrongly randomised to the intervention arm as a separate cluster and was later combined/reassigned. Both changes were made to reduce the potential for contamination. Numbers for women of reproductive age (WRA) assigned to treatment arms come from the screening module at baseline, to which women were routed from the population census based on their age and screened against the other eligibility criteria and asked to participate. Numbers for children under five years of age (u5) assigned to treatment arms come from the baseline population census. Numbers enrolled at each time-point are derived using the women’s survey panel for WRA and the child morbidity panel for u5. Reasons for inclusion and exclusion between survey waves for children under five were derived using data from women’s lifetime birth histories available for mothers surveyed during the follow-up period, and imputed based on child’s age if missing data from the birth histories. Absent and re-enter refer to participants who skipped one or two survey waves and reappear in the cohort. Six entire clusters were lost to follow-up (LTFU) during the trial due to the armed conflict: four were destroyed and two were inaccessible to the survey team.

Table S1: Characteristics of all children under five years of age with any symptom at each time-point

|                                        | Baseline                                                                   |       |                                                                       |       | 12 months                                                                  |       |                                                                       |       | 24 months                                                                  |       |                                                                       |       | 36 months                                                                  |       |                                                                       |       |
|----------------------------------------|----------------------------------------------------------------------------|-------|-----------------------------------------------------------------------|-------|----------------------------------------------------------------------------|-------|-----------------------------------------------------------------------|-------|----------------------------------------------------------------------------|-------|-----------------------------------------------------------------------|-------|----------------------------------------------------------------------------|-------|-----------------------------------------------------------------------|-------|
|                                        | Intervention<br>N=69 clusters<br>4411 HHs<br>5296 mothers<br>8065 children |       | Control<br>N=68 clusters<br>4364 HHs<br>5197 mothers<br>7790 children |       | Intervention<br>N=69 clusters<br>4518 HHs<br>5375 mothers<br>8018 children |       | Control<br>N=68 clusters<br>4401 HHs<br>5217 mothers<br>7751 children |       | Intervention<br>N=67 clusters<br>4389 HHs<br>5223 mothers<br>7881 children |       | Control<br>N=66 clusters<br>4180 HHs<br>4981 mothers<br>7505 children |       | Intervention<br>N=66 clusters<br>4522 HHs<br>5478 mothers<br>8112 children |       | Control<br>N=65 clusters<br>4158 HHs<br>5042 mothers<br>7552 children |       |
|                                        | N                                                                          | %     | N                                                                     | %     | N                                                                          | %     | N                                                                     | %     | N                                                                          | %     | N                                                                     | %     | N                                                                          | %     | N                                                                     | %     |
| <i>Household-level characteristics</i> |                                                                            |       |                                                                       |       |                                                                            |       |                                                                       |       |                                                                            |       |                                                                       |       |                                                                            |       |                                                                       |       |
| Household size                         |                                                                            |       |                                                                       |       |                                                                            |       |                                                                       |       |                                                                            |       |                                                                       |       |                                                                            |       |                                                                       |       |
| Median/IQR                             | 8                                                                          | 5, 11 | 7                                                                     | 5, 10 | 8                                                                          | 5, 12 | 8                                                                     | 5, 11 | 8                                                                          | 5, 12 | 8                                                                     | 5, 11 | 8                                                                          | 5, 12 | 8                                                                     | 5, 12 |
| Household wealth quintile              |                                                                            |       |                                                                       |       |                                                                            |       |                                                                       |       |                                                                            |       |                                                                       |       |                                                                            |       |                                                                       |       |
| Poorest                                | 1243                                                                       | 15.3  | 995                                                                   | 12.8  | 1358                                                                       | 16.9  | 1256                                                                  | 16.2  | 1431                                                                       | 18.2  | 1260                                                                  | 16.8  | 1619                                                                       | 20.0  | 1418                                                                  | 18.9  |
| Poor                                   | 1465                                                                       | 18.2  | 1560                                                                  | 20.0  | 1440                                                                       | 18.0  | 1565                                                                  | 20.2  | 1419                                                                       | 18.0  | 1533                                                                  | 20.4  | 1520                                                                       | 18.7  | 1526                                                                  | 20.3  |
| Middle                                 | 1573                                                                       | 19.5  | 1587                                                                  | 20.4  | 1627                                                                       | 20.3  | 1570                                                                  | 20.3  | 1595                                                                       | 20.2  | 1479                                                                  | 19.7  | 1621                                                                       | 20.0  | 1446                                                                  | 19.2  |
| Rich                                   | 1773                                                                       | 22.0  | 1791                                                                  | 23.0  | 1744                                                                       | 21.8  | 1661                                                                  | 21.4  | 1614                                                                       | 20.5  | 1626                                                                  | 21.7  | 1589                                                                       | 19.6  | 1589                                                                  | 21.1  |
| Richest                                | 1952                                                                       | 24.2  | 1786                                                                  | 22.9  | 1801                                                                       | 22.5  | 1657                                                                  | 21.4  | 1788                                                                       | 22.7  | 1584                                                                  | 21.1  | 1760                                                                       | 21.7  | 1543                                                                  | 20.5  |
| Missing                                | 68                                                                         | 0.8   | 69                                                                    | 0.89  | 48                                                                         | 0.6   | 42                                                                    | 0.5   | 34                                                                         | 0.4   | 23                                                                    | 0.3   | 3                                                                          | 0.0   | 0                                                                     | 0     |
| <i>Mother-level characteristics</i>    |                                                                            |       |                                                                       |       |                                                                            |       |                                                                       |       |                                                                            |       |                                                                       |       |                                                                            |       |                                                                       |       |
| Marital status                         |                                                                            |       |                                                                       |       |                                                                            |       |                                                                       |       |                                                                            |       |                                                                       |       |                                                                            |       |                                                                       |       |
| Not married                            | 89                                                                         | 1.1   | 79                                                                    | 1.0   | 72                                                                         | 0.9   | 73                                                                    | 0.9   | 66                                                                         | 0.8   | 71                                                                    | 1.0   | 97                                                                         | 1.2   | 67                                                                    | 0.9   |
| Polygynous                             | 3417                                                                       | 42.4  | 3363                                                                  | 43.2  | 3568                                                                       | 44.5  | 3352                                                                  | 43.3  | 3566                                                                       | 45.3  | 3376                                                                  | 45.0  | 3819                                                                       | 47.1  | 3547                                                                  | 47.2  |
| Monogamous                             | 4556                                                                       | 56.5  | 4339                                                                  | 55.7  | 4376                                                                       | 54.6  | 4324                                                                  | 55.8  | 4246                                                                       | 53.9  | 4055                                                                  | 54.0  | 4193                                                                       | 51.7  | 3908                                                                  | 52.0  |
| Missing                                | 3                                                                          | 0.0   | 9                                                                     | 0.1   | 2                                                                          | 0.0   | 2                                                                     | 0.0   | 3                                                                          | 0.0   | 3                                                                     | 0.0   | 3                                                                          | 0.0   | 0                                                                     | 0     |
| Parity (reported live births)          |                                                                            |       |                                                                       |       |                                                                            |       |                                                                       |       |                                                                            |       |                                                                       |       |                                                                            |       |                                                                       |       |
| Median/IQR                             | 5                                                                          | 3, 8  | 5                                                                     | 3, 8  | 4                                                                          | 3, 6  | 4                                                                     | 3, 6  | 5                                                                          | 3, 7  | 4                                                                     | 3, 7  | 5                                                                          | 3, 7  | 5                                                                     | 3, 7  |
| 1-2                                    | 1280                                                                       | 15.9  | 1277                                                                  | 16.4  | 1797                                                                       | 22.4  | 1777                                                                  | 22.9  | 1712                                                                       | 21.7  | 1613                                                                  | 21.5  | 1757                                                                       | 21.7  | 1649                                                                  | 21.9  |
| 3-4                                    | 1889                                                                       | 23.4  | 1926                                                                  | 24.7  | 2382                                                                       | 29.7  | 2428                                                                  | 31.3  | 2142                                                                       | 27.2  | 2162                                                                  | 28.8  | 2241                                                                       | 27.6  | 2098                                                                  | 27.9  |
| 5-6                                    | 1522                                                                       | 18.9  | 1485                                                                  | 19.1  | 1985                                                                       | 24.8  | 1884                                                                  | 24.3  | 1804                                                                       | 22.9  | 1695                                                                  | 22.6  | 1953                                                                       | 24.1  | 1858                                                                  | 24.7  |
| 7+                                     | 2663                                                                       | 33.0  | 2357                                                                  | 30.3  | 1854                                                                       | 23.1  | 1662                                                                  | 21.4  | 2223                                                                       | 28.2  | 2035                                                                  | 27.1  | 2161                                                                       | 26.6  | 1917                                                                  | 25.5  |
| Missing                                | 711                                                                        | 8.8   | 745                                                                   | 9.6   | 0                                                                          | 0     | 0                                                                     | 0     | 0                                                                          | 0     | 0                                                                     | 0     | 0                                                                          | 0     | 0                                                                     | 0     |
| Mother's education                     |                                                                            |       |                                                                       |       |                                                                            |       |                                                                       |       |                                                                            |       |                                                                       |       |                                                                            |       |                                                                       |       |
| None                                   | 7503                                                                       | 93.0  | 7151                                                                  | 91.8  | 6829                                                                       | 85.2  | 6528                                                                  | 84.2  | 6677                                                                       | 84.7  | 6269                                                                  | 83.5  | 6778                                                                       | 83.6  | 6260                                                                  | 83.2  |
| Any                                    | 556                                                                        | 6.9   | 633                                                                   | 8.1   | 566                                                                        | 7.1   | 690                                                                   | 8.9   | 677                                                                        | 8.6   | 809                                                                   | 10.8  | 794                                                                        | 9.8   | 881                                                                   | 11.7  |
| Missing                                | 6                                                                          | 0.1   | 6                                                                     | 0.1   | 623                                                                        | 7.8   | 533                                                                   | 6.9   | 527                                                                        | 6.7   | 427                                                                   | 5.7   | 540                                                                        | 6.7   | 381                                                                   | 5.1   |

|                                           |      |       |      |       |      |       |      |       |      |       |      |       |      |       |      |       |
|-------------------------------------------|------|-------|------|-------|------|-------|------|-------|------|-------|------|-------|------|-------|------|-------|
| <b>Mother participates in paid labour</b> |      |       |      |       |      |       |      |       |      |       |      |       |      |       |      |       |
| No                                        | 6973 | 86.5  | 6716 | 86.2  | 6392 | 79.7  | 6247 | 80.6  | 6673 | 84.7  | 6250 | 83.3  | 7009 | 86.4  | 6633 | 88.2  |
| Yes                                       | 1067 | 13.2  | 1055 | 13.5  | 1602 | 20.0  | 1471 | 19.0  | 1204 | 15.3  | 1253 | 16.7  | 1103 | 13.6  | 884  | 11.8  |
| Missing                                   | 25   | 0.3   | 19   | 0.2   | 24   | 0.3   | 33   | 0.4   | 4    | 0.1   | 2    | 0.0   | 0    | 0     | 5    | 0.1   |
| <b>Mother's mobility*</b>                 |      |       |      |       |      |       |      |       |      |       |      |       |      |       |      |       |
| No place                                  | 2686 | 33.3  | 2614 | 33.6  | 2359 | 29.4  | 2305 | 29.7  | 2290 | 29.1  | 2190 | 29.2  | 2276 | 28.1  | 2181 | 29.0  |
| Any place but none alone                  | 1336 | 16.6  | 1431 | 18.4  | 1304 | 16.3  | 1392 | 18.0  | 1260 | 16.0  | 1333 | 17.8  | 1360 | 16.8  | 1393 | 18.5  |
| Any place alone                           | 4028 | 49.9  | 3734 | 47.9  | 3724 | 46.5  | 3518 | 45.4  | 3708 | 47.1  | 3490 | 46.5  | 3777 | 46.6  | 3451 | 45.9  |
| Missing                                   | 15   | 0.2   | 11   | 0.1   | 631  | 7.9   | 536  | 6.9   | 623  | 7.9   | 492  | 6.6   | 699  | 8.6   | 497  | 6.6   |
| <b>Mother's decision-making</b>           |      |       |      |       |      |       |      |       |      |       |      |       |      |       |      |       |
| None                                      | 5789 | 71.8  | 5813 | 74.6  | 5620 | 70.1  | 5399 | 69.7  | 5524 | 70    | 5208 | 69.4  | 5814 | 71.7  | 5239 | 69.7  |
| Any                                       | 2267 | 28.1  | 1972 | 25.3  | 2397 | 29.9  | 2349 | 30.3  | 2339 | 29.7  | 2284 | 30.4  | 2294 | 28.3  | 2279 | 30.3  |
| Missing                                   | 9    | 0.1   | 5    | 0.1   | 1    | 0.0   | 3    | 0.0   | 18   | 0.2   | 13   | 0.2   | 4    | 0.1   | 4    | 0.1   |
| <b>Child-level characteristics</b>        |      |       |      |       |      |       |      |       |      |       |      |       |      |       |      |       |
| <b>Sex</b>                                |      |       |      |       |      |       |      |       |      |       |      |       |      |       |      |       |
| Male                                      | 4080 | 50.6  | 3954 | 50.8  | 4049 | 50.5  | 3960 | 51.1  | 3934 | 49.9  | 3805 | 50.7  | 4041 | 49.8  | 3846 | 51.1  |
| Female                                    | 3985 | 49.4  | 3836 | 49.2  | 3969 | 49.5  | 3791 | 48.9  | 3947 | 50.1  | 3700 | 49.3  | 4071 | 50.2  | 3676 | 48.9  |
| <b>Age (in months)</b>                    |      |       |      |       |      |       |      |       |      |       |      |       |      |       |      |       |
| Median/IQR                                | 29   | 13,44 | 28   | 13,43 | 28   | 15,44 | 28   | 15,44 | 28   | 14,42 | 28   | 14,42 | 29   | 14,43 | 29   | 14,43 |
| 0-11                                      | 1703 | 21.1  | 1639 | 21.0  | 1467 | 18.3  | 1460 | 18.8  | 1695 | 21.5  | 1569 | 20.9  | 1578 | 19.5  | 1446 | 19.2  |
| 12-23                                     | 1582 | 19.6  | 1560 | 20.0  | 1805 | 22.5  | 1757 | 22.7  | 1614 | 20.5  | 1588 | 21.2  | 1748 | 21.6  | 1599 | 21.3  |
| 24-35                                     | 1586 | 19.7  | 1552 | 19.9  | 1567 | 19.5  | 1531 | 19.8  | 1675 | 21.3  | 1614 | 21.5  | 1640 | 20.2  | 1547 | 20.6  |
| 36-59                                     | 3194 | 39.6  | 3039 | 39.0  | 3179 | 39.7  | 3003 | 38.7  | 2897 | 36.8  | 2734 | 36.4  | 3146 | 38.8  | 2930 | 39.0  |

Notes: \*Women's mobility is coded categorically based on them reporting having ever been to the marketplace, health centre, women's group, or outside the village (never been to any, been to some or all but never alone, been to at least one alone). HHs=households.

Table S2: Characteristics of sick children under five years of age with any symptom at each time-point

|                                        | Baseline                                                                   |       |                                                                       |       | 12 months                                                                  |       |                                                                       |       | 24 months                                                                  |       |                                                                       |       | 36 months                                                                  |       |                                                                       |       |
|----------------------------------------|----------------------------------------------------------------------------|-------|-----------------------------------------------------------------------|-------|----------------------------------------------------------------------------|-------|-----------------------------------------------------------------------|-------|----------------------------------------------------------------------------|-------|-----------------------------------------------------------------------|-------|----------------------------------------------------------------------------|-------|-----------------------------------------------------------------------|-------|
|                                        | Intervention<br>N=67 clusters<br>2097 HHs<br>2343 mothers<br>2830 children |       | Control<br>N=68 clusters<br>1893 HHs<br>2095 mothers<br>2512 children |       | Intervention<br>N=69 clusters<br>2715 HHs<br>3023 mothers<br>3700 children |       | Control<br>N=66 clusters<br>2507 HHs<br>2789 mothers<br>3339 children |       | Intervention<br>N=67 clusters<br>2567 HHs<br>2865 mothers<br>3425 children |       | Control<br>N=66 clusters<br>2435 HHs<br>2712 mothers<br>3253 children |       | Intervention<br>N=66 clusters<br>2518 HHs<br>2800 mothers<br>3316 children |       | Control<br>N=65 clusters<br>2343 HHs<br>2615 mothers<br>3072 children |       |
|                                        | N                                                                          | %     | N                                                                     | %     | N                                                                          | %     | N                                                                     | %     | N                                                                          | %     | N                                                                     | %     | N                                                                          | %     | N                                                                     | %     |
| <i>Household-level characteristics</i> |                                                                            |       |                                                                       |       |                                                                            |       |                                                                       |       |                                                                            |       |                                                                       |       |                                                                            |       |                                                                       |       |
| Household size                         |                                                                            |       |                                                                       |       |                                                                            |       |                                                                       |       |                                                                            |       |                                                                       |       |                                                                            |       |                                                                       |       |
| Median/IQR                             | 7                                                                          | 5, 10 | 7                                                                     | 5, 10 | 8                                                                          | 5, 11 | 8                                                                     | 5, 11 | 8                                                                          | 5, 12 | 8                                                                     | 5, 11 | 8                                                                          | 5, 12 | 8                                                                     | 5, 11 |
| Household wealth quintile              |                                                                            |       |                                                                       |       |                                                                            |       |                                                                       |       |                                                                            |       |                                                                       |       |                                                                            |       |                                                                       |       |
| Poorest                                | 494                                                                        | 17.5  | 351                                                                   | 14.0  | 652                                                                        | 17.6  | 533                                                                   | 16.0  | 611                                                                        | 17.8  | 532                                                                   | 16.4  | 663                                                                        | 20.0  | 575                                                                   | 18.7  |
| Poor                                   | 546                                                                        | 19.3  | 507                                                                   | 20.2  | 662                                                                        | 17.9  | 659                                                                   | 19.7  | 626                                                                        | 18.3  | 654                                                                   | 20.1  | 592                                                                        | 17.9  | 624                                                                   | 20.3  |
| Middle                                 | 553                                                                        | 19.5  | 505                                                                   | 20.1  | 725                                                                        | 19.6  | 687                                                                   | 20.6  | 743                                                                        | 21.7  | 648                                                                   | 19.9  | 662                                                                        | 20.0  | 597                                                                   | 19.4  |
| Rich                                   | 576                                                                        | 20.4  | 545                                                                   | 21.7  | 830                                                                        | 22.4  | 761                                                                   | 22.8  | 669                                                                        | 19.5  | 702                                                                   | 21.6  | 683                                                                        | 20.6  | 654                                                                   | 21.3  |
| Richest                                | 628                                                                        | 22.2  | 577                                                                   | 23.0  | 808                                                                        | 21.8  | 690                                                                   | 20.7  | 762                                                                        | 22.3  | 705                                                                   | 21.7  | 714                                                                        | 21.5  | 622                                                                   | 20.3  |
| Missing                                | 33                                                                         | 1.2   | 27                                                                    | 1.1   | 23                                                                         | 0.6   | 9                                                                     | 0.3   | 14                                                                         | 0.4   | 12                                                                    | 0.4   | 2                                                                          | 0.1   | 575                                                                   | 18.7  |
| <i>Mother-level characteristics</i>    |                                                                            |       |                                                                       |       |                                                                            |       |                                                                       |       |                                                                            |       |                                                                       |       |                                                                            |       |                                                                       |       |
| Marital status                         |                                                                            |       |                                                                       |       |                                                                            |       |                                                                       |       |                                                                            |       |                                                                       |       |                                                                            |       |                                                                       |       |
| Not married                            | 32                                                                         | 1.1   | 29                                                                    | 1.2   | 43                                                                         | 1.2   | 29                                                                    | 0.9   | 29                                                                         | 0.9   | 26                                                                    | 0.8   | 38                                                                         | 1.2   | 32                                                                    | 1.0   |
| Polygynous                             | 1138                                                                       | 40.2  | 1074                                                                  | 42.8  | 1651                                                                       | 44.6  | 1474                                                                  | 44.1  | 1552                                                                       | 45.3  | 1435                                                                  | 44.1  | 1565                                                                       | 47.2  | 1443                                                                  | 47.0  |
| Monogamous                             | 1659                                                                       | 58.6  | 1406                                                                  | 56.0  | 2005                                                                       | 54.2  | 1835                                                                  | 55.0  | 1843                                                                       | 53.8  | 1790                                                                  | 55.0  | 1712                                                                       | 51.6  | 1597                                                                  | 52.0  |
| Missing                                | 1                                                                          | 0.1   | 3                                                                     | 0.1   | 1                                                                          | 0.0   | 1                                                                     | 0.0   | 1                                                                          | 0.0   | 2                                                                     | 0.1   | 1                                                                          | 0.0   | 32                                                                    | 1.0   |
| Parity (reported live births)          |                                                                            |       |                                                                       |       |                                                                            |       |                                                                       |       |                                                                            |       |                                                                       |       |                                                                            |       |                                                                       |       |
| Median/IQR                             | 5                                                                          | 3, 8  | 5                                                                     | 3, 7  | 4                                                                          | 3, 6  | 4                                                                     | 3, 6  | 5                                                                          | 3, 7  | 5                                                                     | 3, 7  | 5                                                                          | 3, 7  | 4                                                                     | 3, 7  |
| 1-2                                    | 486                                                                        | 17.2  | 423                                                                   | 16.8  | 852                                                                        | 23.0  | 750                                                                   | 22.5  | 779                                                                        | 22.7  | 741                                                                   | 22.8  | 758                                                                        | 22.9  | 728                                                                   | 23.7  |
| 3-4                                    | 649                                                                        | 22.9  | 601                                                                   | 23.9  | 1071                                                                       | 29.0  | 998                                                                   | 29.9  | 873                                                                        | 25.5  | 884                                                                   | 27.2  | 871                                                                        | 26.3  | 812                                                                   | 26.4  |
| 5-6                                    | 509                                                                        | 18.0  | 477                                                                   | 19.0  | 885                                                                        | 23.9  | 797                                                                   | 23.9  | 791                                                                        | 23.1  | 708                                                                   | 21.8  | 792                                                                        | 23.9  | 738                                                                   | 24.0  |
| 7+                                     | 916                                                                        | 32.4  | 792                                                                   | 31.5  | 892                                                                        | 24.1  | 794                                                                   | 23.8  | 982                                                                        | 28.7  | 920                                                                   | 28.3  | 895                                                                        | 27.0  | 794                                                                   | 25.9  |
| Missing                                | 270                                                                        | 9.5   | 219                                                                   | 8.7   | 0                                                                          | 0     | 0                                                                     | 0     | 0                                                                          | 0     | 0                                                                     | 0     | 0                                                                          | 0     | 0                                                                     | 0     |
| Mother's education                     |                                                                            |       |                                                                       |       |                                                                            |       |                                                                       |       |                                                                            |       |                                                                       |       |                                                                            |       |                                                                       |       |
| None                                   | 2606                                                                       | 92.1  | 2300                                                                  | 91.6  | 3165                                                                       | 85.5  | 2842                                                                  | 85.1  | 2894                                                                       | 84.5  | 2760                                                                  | 84.8  | 2742                                                                       | 82.7  | 2586                                                                  | 84.2  |
| Any                                    | 223                                                                        | 7.9   | 211                                                                   | 8.4   | 263                                                                        | 7.1   | 266                                                                   | 8.0   | 307                                                                        | 9.0   | 327                                                                   | 10.1  | 343                                                                        | 10.3  | 349                                                                   | 11.4  |
| Missing                                | 1                                                                          | 0.0   | 1                                                                     | 0.0   | 272                                                                        | 7.4   | 231                                                                   | 6.9   | 224                                                                        | 6.5   | 166                                                                   | 5.1   | 231                                                                        | 7.0   | 137                                                                   | 4.5   |

| Mother participates in paid labour |      |       |      |       |      |       |      |       |      |       |      |       |      |       |      |       |
|------------------------------------|------|-------|------|-------|------|-------|------|-------|------|-------|------|-------|------|-------|------|-------|
| No                                 | 2363 | 83.5  | 2053 | 81.7  | 2889 | 78.1  | 2660 | 79.7  | 2861 | 83.5  | 2676 | 82.3  | 2777 | 83.8  | 2670 | 86.9  |
| Yes                                | 456  | 16.1  | 454  | 18.1  | 802  | 21.7  | 663  | 19.9  | 561  | 16.4  | 577  | 17.7  | 539  | 16.3  | 399  | 13.0  |
| Missing                            | 11   | 0.4   | 5    | 0.2   | 9    | 0.2   | 16   | 0.5   | 3    | 0.1   | 0    | 0     | 0    | 0     | 3    | 0.1   |
| Mother's mobility*                 |      |       |      |       |      |       |      |       |      |       |      |       |      |       |      |       |
| No place                           | 619  | 21.9  | 642  | 25.6  | 982  | 26.5  | 962  | 28.8  | 977  | 28.5  | 963  | 29.6  | 924  | 27.9  | 898  | 29.2  |
| Any place but none alone           | 587  | 20.7  | 515  | 20.5  | 627  | 17.0  | 547  | 16.4  | 526  | 15.4  | 564  | 17.3  | 554  | 16.7  | 557  | 18.1  |
| Any place alone                    | 1620 | 57.2  | 1354 | 53.9  | 1818 | 49.1  | 1595 | 47.8  | 1651 | 48.2  | 1528 | 47.0  | 1548 | 46.7  | 1425 | 46.4  |
| Missing                            | 4    | 0.1   | 1    | 0.0   | 273  | 7.4   | 235  | 7.0   | 271  | 7.9   | 198  | 6.1   | 290  | 8.8   | 192  | 6.3   |
| Mother's decision-making           |      |       |      |       |      |       |      |       |      |       |      |       |      |       |      |       |
| None                               | 1851 | 65.4  | 1772 | 70.5  | 2489 | 67.3  | 2257 | 67.6  | 2385 | 69.6  | 2233 | 68.6  | 2319 | 69.9  | 2121 | 69.0  |
| Any                                | 976  | 34.5  | 738  | 29.4  | 1210 | 32.7  | 1079 | 32.3  | 1034 | 30.2  | 1015 | 31.2  | 996  | 30.0  | 950  | 30.9  |
| Missing                            | 3    | 0.1   | 2    | 0.1   | 1    | 0.0   | 3    | 0.1   | 6    | 0.2   | 5    | 0.2   | 1    | 0.0   | 1    | 0.0   |
| Child-level characteristics        |      |       |      |       |      |       |      |       |      |       |      |       |      |       |      |       |
| Sex                                |      |       |      |       |      |       |      |       |      |       |      |       |      |       |      |       |
| Male                               | 1433 | 50.6  | 1255 | 50.0  | 1916 | 51.8  | 1753 | 52.5  | 1758 | 51.3  | 1660 | 51.0  | 1666 | 50.2  | 1575 | 51.3  |
| Female                             | 1397 | 49.4  | 1257 | 50.0  | 1784 | 48.2  | 1586 | 47.5  | 1667 | 48.7  | 1593 | 49.0  | 1650 | 49.8  | 1497 | 48.7  |
| Age (in months)                    |      |       |      |       |      |       |      |       |      |       |      |       |      |       |      |       |
| Median/IQR                         | 29   | 15,43 | 27   | 14,42 | 28   | 15,44 | 27   | 15,42 | 27   | 15,40 | 26   | 14,40 | 27   | 14,41 | 28   | 14,41 |
| 0-11                               | 521  | 18.4  | 464  | 18.5  | 694  | 18.8  | 628  | 18.8  | 711  | 20.8  | 677  | 20.8  | 641  | 19.3  | 574  | 18.7  |
| 12-23                              | 599  | 21.2  | 573  | 22.8  | 868  | 23.5  | 805  | 24.1  | 776  | 22.7  | 773  | 23.8  | 805  | 24.3  | 727  | 23.7  |
| 24-35                              | 587  | 20.7  | 554  | 22.1  | 718  | 19.4  | 685  | 20.5  | 770  | 22.5  | 697  | 21.4  | 710  | 21.4  | 674  | 21.9  |
| 36-59                              | 1123 | 39.7  | 921  | 36.7  | 1420 | 38.4  | 1221 | 36.6  | 1168 | 34.1  | 1106 | 34.0  | 1160 | 35.0  | 1097 | 35.7  |

Notes: \*Women's mobility is coded categorically based on them reporting having ever been to the marketplace, health centre, women's group, or outside the village (never been to any, been to some or all but never alone, been to at least one alone). HHs=households.

Table S3: Characteristics of sick children aged 3-59 months with iCCM illnesses at each time-point

|                                        | Baseline                                                                   |       |                                                                       |       | 12 months                                                                  |       |                                                                       |       | 24 months                                                                  |       |                                                                       |       | 36 months                                                                  |       |                                                                       |       |  |
|----------------------------------------|----------------------------------------------------------------------------|-------|-----------------------------------------------------------------------|-------|----------------------------------------------------------------------------|-------|-----------------------------------------------------------------------|-------|----------------------------------------------------------------------------|-------|-----------------------------------------------------------------------|-------|----------------------------------------------------------------------------|-------|-----------------------------------------------------------------------|-------|--|
|                                        | Intervention<br>N=67 clusters<br>1670 HHs<br>1831 mothers<br>2138 children |       | Control<br>N=68 clusters<br>1456 HHs<br>1584 mothers<br>1826 children |       | Intervention<br>N=69 clusters<br>2266 HHs<br>2475 mothers<br>2908 children |       | Control<br>N=66 clusters<br>2020 HHs<br>2236 mothers<br>2579 children |       | Intervention<br>N=67 clusters<br>2064 HHs<br>2268 mothers<br>2612 children |       | Control<br>N=65 clusters<br>1940 HHs<br>2125 mothers<br>2462 children |       | Intervention<br>N=66 clusters<br>1955 HHs<br>2145 mothers<br>2427 children |       | Control<br>N=65 clusters<br>1859 HHs<br>2036 mothers<br>2290 children |       |  |
|                                        | N                                                                          | %     | N                                                                     | %     | N                                                                          | %     | N                                                                     | %     | N                                                                          | %     |                                                                       |       |                                                                            |       |                                                                       |       |  |
| <i>Household-level characteristics</i> |                                                                            |       |                                                                       |       |                                                                            |       |                                                                       |       |                                                                            |       |                                                                       |       |                                                                            |       |                                                                       |       |  |
| Household size                         |                                                                            |       |                                                                       |       |                                                                            |       |                                                                       |       |                                                                            |       |                                                                       |       |                                                                            |       |                                                                       |       |  |
| Median/IQR                             | 7                                                                          | 5, 10 | 7                                                                     | 5, 11 | 8                                                                          | 5, 11 | 8                                                                     | 5, 11 | 8                                                                          | 5, 12 | 8                                                                     | 5, 11 | 8                                                                          | 5, 12 | 8                                                                     | 5, 11 |  |
| Household wealth quintile              |                                                                            |       |                                                                       |       |                                                                            |       |                                                                       |       |                                                                            |       |                                                                       |       |                                                                            |       |                                                                       |       |  |
| Poorest                                | 374                                                                        | 17.5  | 269                                                                   | 14.7  | 504                                                                        | 17.3  | 419                                                                   | 16.3  | 464                                                                        | 17.8  | 384                                                                   | 15.6  | 485                                                                        | 20.0  | 423                                                                   | 18.5  |  |
| Poor                                   | 416                                                                        | 19.5  | 354                                                                   | 19.4  | 528                                                                        | 18.2  | 521                                                                   | 20.2  | 437                                                                        | 16.7  | 489                                                                   | 19.9  | 430                                                                        | 17.7  | 465                                                                   | 20.3  |  |
| Middle                                 | 430                                                                        | 20.1  | 354                                                                   | 19.4  | 568                                                                        | 19.5  | 531                                                                   | 20.6  | 583                                                                        | 22.3  | 497                                                                   | 20.2  | 483                                                                        | 19.9  | 450                                                                   | 19.7  |  |
| Rich                                   | 424                                                                        | 19.8  | 422                                                                   | 23.1  | 656                                                                        | 22.6  | 572                                                                   | 22.2  | 507                                                                        | 19.4  | 543                                                                   | 22.1  | 490                                                                        | 20.2  | 477                                                                   | 20.8  |  |
| Richest                                | 470                                                                        | 22.0  | 410                                                                   | 22.5  | 635                                                                        | 21.8  | 532                                                                   | 20.6  | 608                                                                        | 23.3  | 541                                                                   | 22.0  | 538                                                                        | 22.2  | 475                                                                   | 20.7  |  |
| Missing                                | 24                                                                         | 1.1   | 17                                                                    | 0.9   | 17                                                                         | 0.6   | 4                                                                     | 0.2   | 13                                                                         | 0.5   | 8                                                                     | 0.3   | 1                                                                          | 0.0   | 0                                                                     | 0     |  |
| <i>Mother-level characteristics</i>    |                                                                            |       |                                                                       |       |                                                                            |       |                                                                       |       |                                                                            |       |                                                                       |       |                                                                            |       |                                                                       |       |  |
| Marital status                         |                                                                            |       |                                                                       |       |                                                                            |       |                                                                       |       |                                                                            |       |                                                                       |       |                                                                            |       |                                                                       |       |  |
| Not married                            | 25                                                                         | 1.2   | 19                                                                    | 1.0   | 37                                                                         | 1.3   | 21                                                                    | 0.8   | 21                                                                         | 0.8   | 19                                                                    | 0.8   | 25                                                                         | 1.0   | 20                                                                    | 0.9   |  |
| Polygynous                             | 878                                                                        | 41.1  | 776                                                                   | 42.5  | 1314                                                                       | 45.2  | 1152                                                                  | 44.7  | 1208                                                                       | 46.3  | 1099                                                                  | 44.6  | 1161                                                                       | 47.8  | 1078                                                                  | 47.1  |  |
| Monogamous                             | 1234                                                                       | 57.7  | 1029                                                                  | 56.4  | 1556                                                                       | 53.5  | 1406                                                                  | 54.5  | 1382                                                                       | 52.9  | 1342                                                                  | 54.5  | 1241                                                                       | 51.1  | 1192                                                                  | 52.1  |  |
| Missing                                | 1                                                                          | 0.1   | 2                                                                     | 0.1   | 1                                                                          | 0.0   | 0                                                                     | 0     | 1                                                                          | 0.0   | 2                                                                     | 0.1   | 0                                                                          | 0     | 0                                                                     | 0     |  |
| Parity (reported live births)          |                                                                            |       |                                                                       |       |                                                                            |       |                                                                       |       |                                                                            |       |                                                                       |       |                                                                            |       |                                                                       |       |  |
| Median/IQR                             | 5                                                                          | 3, 8  | 5                                                                     | 3, 8  | 4                                                                          | 3, 6  | 4                                                                     | 3, 6  | 5                                                                          | 3, 7  | 5                                                                     | 3, 7  | 5                                                                          | 3, 7  | 5                                                                     | 3, 7  |  |
| 1-2                                    | 353                                                                        | 16.5  | 320                                                                   | 17.5  | 669                                                                        | 23.0  | 557                                                                   | 21.6  | 583                                                                        | 22.3  | 549                                                                   | 22.3  | 564                                                                        | 23.2  | 529                                                                   | 23.1  |  |
| 3-4                                    | 478                                                                        | 22.4  | 427                                                                   | 23.4  | 838                                                                        | 28.8  | 776                                                                   | 30.1  | 652                                                                        | 25.0  | 671                                                                   | 27.3  | 632                                                                        | 26.0  | 604                                                                   | 26.4  |  |
| 5-6                                    | 396                                                                        | 18.5  | 330                                                                   | 18.1  | 687                                                                        | 23.6  | 627                                                                   | 24.3  | 606                                                                        | 23.2  | 533                                                                   | 21.7  | 578                                                                        | 23.8  | 538                                                                   | 23.5  |  |
| 7+                                     | 703                                                                        | 32.9  | 593                                                                   | 32.5  | 714                                                                        | 24.6  | 619                                                                   | 24.0  | 771                                                                        | 29.5  | 709                                                                   | 28.8  | 653                                                                        | 26.9  | 619                                                                   | 27.0  |  |
| Missing                                | 208                                                                        | 9.7   | 156                                                                   | 8.5   | 0                                                                          | 0     | 0                                                                     | 0     | 0                                                                          | 0     | 0                                                                     | 0     | 0                                                                          | 0     | 0                                                                     | 0     |  |
| Mother's education                     |                                                                            |       |                                                                       |       |                                                                            |       |                                                                       |       |                                                                            |       |                                                                       |       |                                                                            |       |                                                                       |       |  |
| None                                   | 1974                                                                       | 92.3  | 1681                                                                  | 92.1  | 2507                                                                       | 86.2  | 2214                                                                  | 85.9  | 2211                                                                       | 84.7  | 2090                                                                  | 84.9  | 1998                                                                       | 82.3  | 1937                                                                  | 84.6  |  |
| Any                                    | 164                                                                        | 7.7   | 144                                                                   | 7.9   | 199                                                                        | 6.8   | 193                                                                   | 7.5   | 223                                                                        | 8.5   | 249                                                                   | 10.1  | 260                                                                        | 10.7  | 250                                                                   | 10.9  |  |
| Missing                                | 0                                                                          | 0     | 1                                                                     | 0.1   | 202                                                                        | 7.0   | 172                                                                   | 6.7   | 178                                                                        | 6.8   | 123                                                                   | 5.0   | 169                                                                        | 7.0   | 103                                                                   | 4.5   |  |



| Mother participates in paid labour |      |       |      |       |      |       |      |       |      |       |      |       |      |       |      |       |
|------------------------------------|------|-------|------|-------|------|-------|------|-------|------|-------|------|-------|------|-------|------|-------|
| No                                 | 1771 | 82.8  | 1492 | 81.7  | 2299 | 79.1  | 2061 | 79.9  | 2189 | 83.8  | 2016 | 81.9  | 2038 | 84.0  | 1994 | 87.1  |
| Yes                                | 359  | 16.8  | 330  | 18.1  | 600  | 20.6  | 507  | 19.7  | 420  | 16.1  | 446  | 18.1  | 389  | 16.0  | 296  | 12.9  |
| Missing                            | 8    | 0.4   | 4    | 0.2   | 9    | 0.3   | 11   | 0.4   | 3    | 0.1   | 0    | 0     | 0    | 0     | 0    | 0     |
| Mother's mobility*                 |      |       |      |       |      |       |      |       |      |       |      |       |      |       |      |       |
| No place                           | 451  | 21.1  | 467  | 25.6  | 767  | 26.4  | 732  | 28.4  | 721  | 27.6  | 742  | 30.1  | 672  | 27.7  | 659  | 28.8  |
| Any place but none alone           | 447  | 20.9  | 371  | 20.3  | 495  | 17.0  | 421  | 16.3  | 413  | 15.8  | 415  | 16.9  | 391  | 16.1  | 424  | 18.5  |
| Any place alone                    | 1237 | 57.9  | 988  | 54.1  | 1440 | 49.5  | 1251 | 48.5  | 1265 | 48.4  | 1157 | 47.0  | 1151 | 47.4  | 1063 | 46.4  |
| Missing                            | 3    | 0.1   | 0    | 0     | 206  | 7.1   | 175  | 6.8   | 213  | 8.2   | 148  | 6.0   | 213  | 8.8   | 144  | 6.3   |
| Mother's decision-making           |      |       |      |       |      |       |      |       |      |       |      |       |      |       |      |       |
| None                               | 1377 | 64.4  | 1270 | 69.6  | 1948 | 67.0  | 1721 | 66.7  | 1808 | 69.2  | 1672 | 67.9  | 1695 | 69.8  | 1563 | 68.3  |
| Any                                | 758  | 35.5  | 555  | 30.4  | 960  | 33.0  | 856  | 33.2  | 799  | 30.6  | 788  | 32.0  | 732  | 30.2  | 726  | 31.7  |
| Missing                            | 3    | 0.1   | 1    | 0.1   | 0    | 0     | 2    | 0.1   | 5    | 0.2   | 2    | 0.1   | 0    | 0     | 1    | 0.0   |
| Child-level characteristics        |      |       |      |       |      |       |      |       |      |       |      |       |      |       |      |       |
| Sex                                |      |       |      |       |      |       |      |       |      |       |      |       |      |       |      |       |
| Male                               | 1076 | 50.3  | 908  | 49.7  | 1507 | 51.8  | 1348 | 52.3  | 1334 | 51.1  | 1251 | 50.8  | 1240 | 51.1  | 1177 | 51.4  |
| Female                             | 1062 | 49.7  | 918  | 50.3  | 1401 | 48.2  | 1231 | 47.7  | 1278 | 48.9  | 1211 | 49.2  | 1187 | 48.9  | 1113 | 48.6  |
| Age (in months)                    |      |       |      |       |      |       |      |       |      |       |      |       |      |       |      |       |
| Median/IQR                         | 31   | 17,44 | 28   | 16,42 | 29   | 15,44 | 27   | 15,43 | 28   | 15,40 | 27   | 15,41 | 27   | 15,41 | 28   | 15,41 |
| 0-11                               | 302  | 14.1  | 280  | 15.3  | 496  | 17.1  | 441  | 17.1  | 451  | 17.3  | 423  | 17.2  | 413  | 17.0  | 373  | 16.3  |
| 12-23                              | 474  | 22.2  | 442  | 24.2  | 693  | 23.8  | 633  | 24.5  | 626  | 24.0  | 645  | 26.2  | 623  | 25.7  | 555  | 24.2  |
| 24-35                              | 463  | 21.7  | 419  | 23.0  | 572  | 19.7  | 523  | 20.3  | 622  | 23.8  | 540  | 21.9  | 541  | 22.3  | 530  | 23.1  |
| 36-59                              | 899  | 42.1  | 685  | 37.5  | 1147 | 39.4  | 982  | 38.1  | 913  | 35.0  | 854  | 34.7  | 850  | 35.0  | 832  | 36.3  |

Notes: \*Women's mobility is coded categorically based on them reporting having ever been to the marketplace, health centre, women's group, or outside the village (never been to any, been to some or all but never alone, been to at least one alone). HHs=households.

Table S4: Baseline cluster-level characteristics by arm among entire clusters lost due to violent insecurity during the follow-up period.

|                                                           | Intervention<br>N=3 |           | Control<br>N=3 |          |
|-----------------------------------------------------------|---------------------|-----------|----------------|----------|
|                                                           | N                   | %         | N              | %        |
| Population size (people)                                  |                     |           |                |          |
| Median/IQR                                                | 374                 | 148, 443  | 489            | 309, 513 |
| <700                                                      | 3                   | 100       | 3              | 100      |
| =>700                                                     | 0                   | 0         | 0              | 0        |
| Distance from PHC (in km)                                 |                     |           |                |          |
| Median/IQR                                                | 8.2                 | 7.3, 12.5 | 6.4            | 4.8, 6.8 |
| <=5.0                                                     | 0                   | 0         | 1              | 33.3     |
| >5.0                                                      | 3                   | 100       | 2              | 66.7     |
| Topography                                                |                     |           |                |          |
| None                                                      | 2                   | 66.7      | 3              | 100      |
| On clifftop                                               | 1                   | 33.3      | 0              | 0        |
| PHC inaccessible during rainy season (June, July, August) | 0                   | 0         | 0              | 0        |
| CHW services available                                    |                     |           |                |          |
| None                                                      | 2                   | 66.7      | 1              | 33.3     |
| Satellite village                                         | 1                   | 33.3      | 2              | 66.7     |
| Posted village                                            | 0                   | 0         | 0              | 0        |
| PHC catchment area                                        |                     |           |                |          |
| Dimbal                                                    | 1                   | 33.3      | 0              | 0        |
| Lessagou                                                  | 0                   | 0         | 0              | 0        |
| Doundé                                                    | 0                   | 0         | 0              | 0        |
| Ende                                                      | 0                   | 0         | 0              | 0        |
| Soubala                                                   | 0                   | 0         | 0              | 0        |
| Kanibozon                                                 | 2                   | 66.7      | 1              | 33.3     |
| Koulongon                                                 | 0                   | 0         | 2              | 66.7     |

Table S5: Sample characteristics (A) between sick under-five child-year observations with complete and missing data on any general health-care utilisation outcome throughout the three-year follow-up period, and (B) between arms among those child-years with missing outcome data.

|                                        | A                                |       |                               |       | B                                 |       |                              |       |
|----------------------------------------|----------------------------------|-------|-------------------------------|-------|-----------------------------------|-------|------------------------------|-------|
|                                        | Complete<br>N=18,743 child-years |       | Missing<br>N=1362 child-years |       | Intervention<br>N=744 child-years |       | Control<br>N=618 child-years |       |
|                                        | N                                | %     | N                             | %     |                                   |       |                              |       |
| <i>Catchment area</i>                  |                                  |       |                               |       |                                   |       |                              |       |
| Dimbal                                 | 4237                             | 22.6  | 313                           | 23.0  | 132                               | 17.7  | 181                          | 29.3  |
| Lessagou                               | 3023                             | 16.1  | 191                           | 14.0  | 141                               | 19.0  | 50                           | 8.1   |
| Doundé                                 | 2349                             | 12.5  | 140                           | 10.3  | 89                                | 12.0  | 51                           | 8.3   |
| Ende                                   | 883                              | 4.7   | 67                            | 4.9   | 39                                | 5.2   | 28                           | 4.5   |
| Soubala                                | 3729                             | 19.9  | 305                           | 22.4  | 159                               | 21.4  | 146                          | 23.6  |
| Kanibozon                              | 1792                             | 9.6   | 130                           | 9.5   | 83                                | 11.2  | 47                           | 7.6   |
| Koulongon                              | 2730                             | 14.6  | 216                           | 15.9  | 101                               | 13.6  | 115                          | 18.6  |
| <i>Household-level characteristics</i> |                                  |       |                               |       |                                   |       |                              |       |
| <i>Household size</i>                  |                                  |       |                               |       |                                   |       |                              |       |
| Median/IQR                             | 8                                | 5, 11 | 8                             | 5, 11 | 8                                 | 5, 11 | 8                            | 5, 11 |
| <i>Household wealth quintile</i>       |                                  |       |                               |       |                                   |       |                              |       |
| Poorest                                | 3340                             | 17.8  | 226                           | 16.6  | 141                               | 19.0  | 85                           | 13.8  |
| Poor                                   | 3574                             | 19.1  | 243                           | 17.8  | 114                               | 15.3  | 129                          | 20.9  |
| Middle                                 | 3771                             | 20.1  | 291                           | 21.4  | 169                               | 22.7  | 122                          | 19.7  |
| Rich                                   | 4014                             | 21.4  | 285                           | 20.9  | 136                               | 18.3  | 149                          | 24.1  |
| Richest                                | 3988                             | 21.3  | 313                           | 23.0  | 182                               | 24.5  | 131                          | 21.2  |
| Missing                                | 56                               | 0.3   | 4                             | 0.3   | 2                                 | 0.3   | 2                            | 0.3   |
| <i>Mother-level characteristics</i>    |                                  |       |                               |       |                                   |       |                              |       |
| <i>Marital status</i>                  |                                  |       |                               |       |                                   |       |                              |       |
| Not married                            | 185                              | 1.0   | 12                            | 0.9   | 9                                 | 1.2   | 3                            | 0.5   |
| Polygynous                             | 8475                             | 45.2  | 645                           | 47.4  | 358                               | 48.1  | 287                          | 46.4  |
| Monogamous                             | 10078                            | 53.8  | 704                           | 51.7  | 377                               | 50.7  | 327                          | 52.9  |
| Missing                                | 5                                | 0.0   | 1                             | 0.1   | 0                                 | 0     | 1                            | 0.2   |
| <i>Parity (reported live births)</i>   |                                  |       |                               |       |                                   |       |                              |       |
| Median/IQR                             | 4                                | 3, 7  | 5                             | 3, 7  | 5                                 | 3, 7  | 5                            | 3, 7  |
| 1-2                                    | 4313                             | 23.0  | 295                           | 21.7  | 166                               | 22.3  | 129                          | 20.9  |
| 3-4                                    | 5143                             | 27.4  | 366                           | 26.9  | 205                               | 27.6  | 161                          | 26.1  |

|                                    |       |        |      |        |     |        |     |        |
|------------------------------------|-------|--------|------|--------|-----|--------|-----|--------|
| 5-6                                | 4382  | 23.4   | 329  | 24.2   | 160 | 21.5   | 169 | 27.4   |
| 7+                                 | 4905  | 26.2   | 372  | 27.3   | 213 | 28.6   | 159 | 25.7   |
| Mother's education                 |       |        |      |        |     |        |     |        |
| None                               | 15836 | 84.5   | 1153 | 84.7   | 620 | 83.3   | 533 | 86.3   |
| Any                                | 1723  | 9.2    | 132  | 9.7    | 69  | 9.3    | 63  | 10.2   |
| Missing                            | 1184  | 6.3    | 77   | 5.7    | 55  | 7.4    | 22  | 3.6    |
| Mother participates in paid labour |       |        |      |        |     |        |     |        |
| No                                 | 15396 | 82.1   | 1137 | 83.5   | 628 | 84.4   | 509 | 82.4   |
| Yes                                | 3317  | 17.7   | 224  | 16.5   | 115 | 15.5   | 109 | 17.6   |
| Missing                            | 30    | 0.2    | 1    | 0.1    | 1   | 0.1    | 0   | 0      |
| Mother's mobility                  |       |        |      |        |     |        |     |        |
| No place                           | 5330  | 28.4   | 376  | 27.6   | 191 | 25.7   | 185 | 29.9   |
| Any place but none alone           | 3164  | 16.9   | 211  | 15.5   | 114 | 15.3   | 97  | 15.7   |
| Any place alone                    | 8885  | 47.4   | 680  | 49.9   | 378 | 50.8   | 302 | 48.9   |
| Missing                            | 1364  | 7.3    | 95   | 7.0    | 61  | 8.2    | 34  | 5.5    |
| Mother's decision-making           |       |        |      |        |     |        |     |        |
| None                               | 12871 | 68.7   | 933  | 68.5   | 506 | 68.0   | 427 | 69.1   |
| Any                                | 5857  | 31.3   | 427  | 31.4   | 237 | 31.9   | 190 | 30.7   |
| Missing                            | 15    | 0.1    | 2    | 0.2    | 1   | 0.1    | 1   | 0.2    |
| <i>Child-level characteristics</i> |       |        |      |        |     |        |     |        |
| Sex                                |       |        |      |        |     |        |     |        |
| Male                               | 9618  | 51.3   | 710  | 52.1   | 381 | 51.2   | 329 | 53.2   |
| Female                             | 9125  | 48.7   | 652  | 47.9   | 363 | 48.8   | 289 | 46.8   |
| Age (in months)                    |       |        |      |        |     |        |     |        |
| Median/IQR                         | 27    | 14, 42 | 27   | 15, 41 | 27  | 15, 40 | 27  | 15, 42 |
| 0-11                               | 3697  | 19.7   | 228  | 16.7   | 125 | 16.8   | 103 | 16.7   |
| 12-23                              | 4397  | 23.5   | 357  | 26.2   | 196 | 26.3   | 161 | 26.1   |
| 24-35                              | 3944  | 21.0   | 310  | 22.8   | 169 | 22.7   | 141 | 22.8   |
| 36-59                              | 6705  | 35.8   | 467  | 34.3   | 254 | 34.1   | 213 | 34.5   |

Table S6: Sample characteristics (A) between sick with iCCM illness child-year observations with complete and missing data on any recommended case management outcome throughout the three-year follow-up period, and (B) between arms among those child-years with missing outcome data.

|                                        | A                                |       |                              |       | B                                 |       |                              |       |
|----------------------------------------|----------------------------------|-------|------------------------------|-------|-----------------------------------|-------|------------------------------|-------|
|                                        | Complete<br>N=14,661 child-years |       | Missing<br>N=617 child-years |       | Intervention<br>N=336 child-years |       | Control<br>N=281 child-years |       |
|                                        | N                                | %     | N                            | %     |                                   |       |                              |       |
| <i>Catchment area</i>                  |                                  |       |                              |       |                                   |       |                              |       |
| Dimbal                                 | 3314                             | 22.6  | 137                          | 22.2  | 56                                | 16.7  | 81                           | 28.8  |
| Lessagou                               | 2414                             | 16.5  | 86                           | 13.9  | 59                                | 17.6  | 27                           | 9.6   |
| Doundé                                 | 1776                             | 12.1  | 65                           | 10.5  | 33                                | 9.8   | 32                           | 11.4  |
| Ende                                   | 651                              | 4.4   | 34                           | 5.5   | 26                                | 7.7   | 8                            | 2.9   |
| Soubala                                | 2917                             | 19.9  | 152                          | 24.6  | 85                                | 25.3  | 67                           | 23.8  |
| Kanibozon                              | 1359                             | 9.3   | 51                           | 8.3   | 33                                | 9.8   | 18                           | 6.4   |
| Koulongon                              | 2230                             | 15.2  | 92                           | 14.9  | 44                                | 13.1  | 48                           | 17.1  |
| <i>Household-level characteristics</i> |                                  |       |                              |       |                                   |       |                              |       |
| <i>Household size</i>                  |                                  |       |                              |       |                                   |       |                              |       |
| Median/IQR                             | 8                                | 5, 11 | 8                            | 5, 11 | 8                                 | 5, 11 | 7                            | 5, 11 |
| <i>Household wealth quintile</i>       |                                  |       |                              |       |                                   |       |                              |       |
| Poorest                                | 2574                             | 17.6  | 105                          | 17.0  | 64                                | 19.1  | 41                           | 14.6  |
| Poor                                   | 2760                             | 18.8  | 110                          | 17.8  | 56                                | 16.7  | 54                           | 19.2  |
| Middle                                 | 2993                             | 20.4  | 119                          | 19.3  | 65                                | 19.4  | 54                           | 19.2  |
| Rich                                   | 3112                             | 21.2  | 133                          | 21.6  | 64                                | 19.1  | 69                           | 24.6  |
| Richest                                | 3183                             | 21.7  | 146                          | 23.7  | 85                                | 25.3  | 61                           | 21.7  |
| Missing                                | 39                               | 0.3   | 4                            | 0.7   | 2                                 | 0.6   | 2                            | 0.7   |
| <i>Mother-level characteristics</i>    |                                  |       |                              |       |                                   |       |                              |       |
| <i>Marital status</i>                  |                                  |       |                              |       |                                   |       |                              |       |
| Not married                            | 137                              | 0.9   | 6                            | 1.0   | 6                                 | 1.8   |                              |       |
| Polygynous                             | 6711                             | 45.8  | 301                          | 48.8  | 179                               | 53.3  | 122                          | 43.4  |
| Monogamous                             | 7810                             | 53.3  | 309                          | 50.1  | 151                               | 44.9  | 158                          | 56.2  |
| Missing                                | 3                                | 0.0   | 1                            | 0.2   | 0                                 | 0     | 1                            | 0.4   |
| <i>Parity (reported live births)</i>   |                                  |       |                              |       |                                   |       |                              |       |
| Median/IQR                             | 5                                | 3, 7  | 4                            | 3, 7  | 5                                 | 3, 7  | 4                            | 3, 6  |
| 1-2                                    | 3303                             | 22.5  | 148                          | 24.0  | 79                                | 23.5  | 69                           | 24.6  |
| 3-4                                    | 4007                             | 27.3  | 166                          | 26.9  | 83                                | 24.7  | 83                           | 29.5  |

|                                    |       |        |     |        |     |        |     |        |
|------------------------------------|-------|--------|-----|--------|-----|--------|-----|--------|
| 5-6                                | 3435  | 23.4   | 134 | 21.7   | 69  | 20.5   | 65  | 23.1   |
| 7+                                 | 3916  | 26.7   | 169 | 27.4   | 105 | 31.3   | 64  | 22.8   |
| Mother's education                 |       |        |     |        |     |        |     |        |
| None                               | 12429 | 84.8   | 528 | 85.6   | 283 | 84.2   | 245 | 87.2   |
| Any                                | 1320  | 9.0    | 54  | 8.8    | 27  | 8.0    | 27  | 9.6    |
| Missing                            | 912   | 6.2    | 35  | 5.7    | 26  | 7.7    | 9   | 3.2    |
| Mother participates in paid labour |       |        |     |        |     |        |     |        |
| No                                 | 12081 | 82.4   | 516 | 83.6   | 286 | 85.1   | 230 | 81.9   |
| Yes                                | 2557  | 17.4   | 101 | 16.4   | 50  | 14.9   | 51  | 18.2   |
| Missing                            | 23    | 0.2    | 0   | 0      | 0   | 0      | 0   | 0      |
| Mother's mobility                  |       |        |     |        |     |        |     |        |
| No place                           | 4123  | 28.1   | 170 | 27.6   | 89  | 26.5   | 81  | 28.8   |
| Any place but none alone           | 2460  | 16.8   | 99  | 16.1   | 53  | 15.8   | 46  | 16.4   |
| Any place alone                    | 7022  | 47.9   | 305 | 49.4   | 165 | 49.1   | 140 | 49.8   |
| Missing                            | 1056  | 7.2    | 43  | 7.0    | 29  | 8.6    | 14  | 5.0    |
| Mother's decision-making           |       |        |     |        |     |        |     |        |
| None                               | 9999  | 68.2   | 408 | 66.1   | 216 | 64.3   | 192 | 68.3   |
| Any                                | 4653  | 31.7   | 208 | 33.7   | 119 | 35.4   | 89  | 31.7   |
| Missing                            | 9     | 0.1    | 1   | 0.2    | 1   | 0.3    | 0   | 0      |
| <i>Child-level characteristics</i> |       |        |     |        |     |        |     |        |
| Sex                                |       |        |     |        |     |        |     |        |
| Male                               | 7533  | 51.4   | 324 | 52.5   | 173 | 51.5   | 151 | 53.7   |
| Female                             | 7128  | 48.6   | 293 | 47.5   | 163 | 48.5   | 130 | 46.3   |
| Age (in months)                    |       |        |     |        |     |        |     |        |
| Median/IQR                         | 28    | 15, 42 | 24  | 14, 37 | 26  | 15, 38 | 23  | 13, 35 |
| 0-11                               | 2490  | 17.0   | 107 | 17.3   | 50  | 14.9   | 57  | 20.3   |
| 12-23                              | 3588  | 24.5   | 187 | 30.3   | 102 | 30.4   | 85  | 30.3   |
| 24-35                              | 3174  | 21.7   | 154 | 25.0   | 85  | 25.3   | 69  | 24.6   |
| 36-59                              | 5409  | 36.9   | 169 | 27.4   | 99  | 29.5   | 70  | 24.9   |

Table S7: Sample characteristics (A) between child-year observations with complete and missing data on any disease prevalence outcome throughout the three-year follow-up period, and (B) between arms among those child-years with missing outcome data.

|                                        | A                                |       |                             |       | B                                |         |                             |       |
|----------------------------------------|----------------------------------|-------|-----------------------------|-------|----------------------------------|---------|-----------------------------|-------|
|                                        | Complete<br>N=46,691 child-years |       | Missing<br>N=98 child-years |       | Intervention<br>N=48 child-years |         | Control<br>N=50 child-years |       |
|                                        | N                                | %     | N                           | %     |                                  |         |                             |       |
| <i>Catchment area</i>                  |                                  |       |                             |       |                                  |         |                             |       |
| Dimbal                                 | 10419                            | 22.3  | 22                          | 22.5  | 9                                | 18.8    | 13                          | 26.0  |
| Lessagou                               | 6950                             | 14.9  | 15                          | 15.3  | 9                                | 18.8    | 6                           | 12.0  |
| Doundé                                 | 6037                             | 12.9  | 12                          | 12.2  | 7                                | 14.6    | 5                           | 10.0  |
| Ende                                   | 2464                             | 5.3   | 6                           | 6.1   | 5                                | 10.4    | 1                           | 2.0   |
| Soubala                                | 9206                             | 19.7  | 14                          | 14.3  | 8                                | 16.7    | 6                           | 12.0  |
| Kanibozon                              | 4760                             | 10.2  | 9                           | 9.2   | 6                                | 12.5    | 3                           | 6.0   |
| Koulongon                              | 6855                             | 14.7  | 20                          | 20.4  | 4                                | 8.3     | 16                          | 32.0  |
| <i>Household-level characteristics</i> |                                  |       |                             |       |                                  |         |                             |       |
| <i>Household size</i>                  |                                  |       |                             |       |                                  |         |                             |       |
| Median/IQR                             | 8                                | 5, 11 | 7                           | 5, 10 | 8                                | 6, 10.5 | 7                           | 5, 10 |
| <i>Household wealth quintile</i>       |                                  |       |                             |       |                                  |         |                             |       |
| Poorest                                | 8321                             | 17.8  | 21                          | 21.4  | 9                                | 18.8    | 12                          | 24.0  |
| Poor                                   | 8975                             | 19.2  | 28                          | 28.6  | 12                               | 25.0    | 16                          | 32.0  |
| Middle                                 | 9315                             | 20.0  | 23                          | 23.5  | 10                               | 20.8    | 13                          | 26.0  |
| Rich                                   | 9806                             | 21.0  | 17                          | 17.4  | 11                               | 22.9    | 6                           | 12.0  |
| Richest                                | 10124                            | 21.7  | 9                           | 9.2   | 6                                | 12.5    | 3                           | 6.0   |
| Missing                                | 150                              | 0.3   | 0                           | 0     | 0                                | 0       | 0                           | 0     |
| <i>Mother-level characteristics</i>    |                                  |       |                             |       |                                  |         |                             |       |
| <i>Marital status</i>                  |                                  |       |                             |       |                                  |         |                             |       |
| Not married                            | 444                              | 1.0   | 2                           | 2.0   | 1                                | 2.1     | 1                           | 2.0   |
| Polygynous                             | 21181                            | 45.4  | 47                          | 48.0  | 28                               | 58.3    | 19                          | 38.0  |
| Monogamous                             | 25054                            | 53.7  | 48                          | 49.0  | 19                               | 39.6    | 29                          | 58.0  |
| Missing                                | 12                               | 0.0   | 1                           | 1.0   | 0                                | 0       | 1                           | 2.0   |
| <i>Parity (reported live births)</i>   |                                  |       |                             |       |                                  |         |                             |       |
| Median/IQR                             | 4                                | 3, 7  | 4                           | 3, 7  | 3.5                              | 2, 6.5  | 4                           | 3, 7  |
| 1-2                                    | 10281                            | 22.0  | 24                          | 24.5  | 13                               | 27.1    | 11                          | 22.0  |
| 3-4                                    | 13421                            | 28.7  | 32                          | 32.7  | 15                               | 31.3    | 17                          | 34.0  |
| 5-6                                    | 11162                            | 23.9  | 17                          | 17.4  | 8                                | 16.7    | 9                           | 18.0  |

|                                           |       |        |    |        |    |          |      |        |
|-------------------------------------------|-------|--------|----|--------|----|----------|------|--------|
| 7+                                        | 11827 | 25.3   | 25 | 25.5   | 12 | 25.0     | 13   | 26.0   |
| <b>Mother's education</b>                 |       |        |    |        |    |          |      |        |
| None                                      | 39259 | 84.1   | 82 | 83.7   | 40 | 83.3     | 42   | 84.0   |
| Any                                       | 4408  | 9.4    | 9  | 9.2    | 4  | 8.3      | 5    | 10.0   |
| Missing                                   | 3024  | 6.5    | 7  | 7.1    | 4  | 8.3      | 3    | 6.0    |
| <b>Mother participates in paid labour</b> |       |        |    |        |    |          |      |        |
| No                                        | 39117 | 83.8   | 87 | 88.8   | 41 | 85.4     | 46   | 92.0   |
| Yes                                       | 7506  | 16.1   | 11 | 11.2   | 7  | 14.6     | 4    | 8.0    |
| Missing                                   | 68    | 0.2    | 0  | 0      | 0  | 0        | 0    | 0      |
| <b>Mother's mobility</b>                  |       |        |    |        |    |          |      |        |
| No place                                  | 13569 | 29.1   | 32 | 32.7   | 19 | 39.6     | 13   | 26.0   |
| Any place but none alone                  | 8033  | 17.2   | 9  | 9.2    | 3  | 6.3      | 6    | 12.0   |
| Any place alone                           | 21621 | 46.3   | 47 | 48.0   | 19 | 39.6     | 28   | 56.0   |
| Missing                                   | 3468  | 7.4    | 10 | 10.2   | 7  | 14.6     | 3    | 6.0    |
| <b>Mother's decision-making</b>           |       |        |    |        |    |          |      |        |
| None                                      | 32748 | 70.1   | 56 | 57.1   | 27 | 56.3     | 29   | 58.0   |
| Any                                       | 13900 | 29.8   | 42 | 42.9   | 21 | 43.8     | 21   | 42.0   |
| Missing                                   | 43    | 0.1    | 0  | 0      | 0  | 0        | 0    | 0      |
| <i>Child-level characteristics</i>        |       |        |    |        |    |          |      |        |
| <b>Sex</b>                                |       |        |    |        |    |          |      |        |
| Male                                      | 23580 | 50.5   | 55 | 56.1   | 28 | 58.3     | 27   | 54.0   |
| Female                                    | 23111 | 49.5   | 43 | 43.9   | 20 | 41.7     | 23   | 46.0   |
| <b>Age (in months)</b>                    |       |        |    |        |    |          |      |        |
| Median/IQR                                | 37    | 22, 49 | 28 | 14, 43 | 37 | 24, 43.5 | 36.5 | 18, 51 |
| 0-11                                      | 9200  | 19.7   | 15 | 15.3   | 6  | 12.5     | 9    | 18.0   |
| 12-23                                     | 10098 | 21.6   | 13 | 13.3   | 6  | 12.5     | 7    | 14.0   |
| 24-35                                     | 9558  | 20.5   | 16 | 16.3   | 8  | 16.7     | 8    | 16.0   |
| 36-59                                     | 17835 | 38.2   | 54 | 55.1   | 28 | 58.3     | 26   | 52.0   |



Table S8: Sensitivity analyses on the primary outcome, any prompt treatment, recommended case management, and prompt, recommended case management due to missing data, especially at 24 months

|                                              | Model 1:<br>Assume experienced event |            |         | Model 2:<br>Assume did not experience event |            |         | Model 3:<br>MICE              |            |                |
|----------------------------------------------|--------------------------------------|------------|---------|---------------------------------------------|------------|---------|-------------------------------|------------|----------------|
|                                              | AOR <sub>CS</sub><br>(C vs I)        | 95% CIs    | p-value | AOR <sub>CS</sub><br>(C vs I)               | 95% CIs    | p-value | AOR <sub>CS</sub><br>(C vs I) | 95% CIs    | p-value        |
| <b>Prompt treatment within health sector</b> |                                      |            |         |                                             |            |         |                               |            |                |
| Overall                                      | 1.12                                 | 1.00, 1.26 | 0.059   | 1.08                                        | 0.96, 1.20 | 0.189   | 1.12                          | 0.99, 1.26 | 0.066          |
| Time-point                                   |                                      |            |         |                                             |            |         |                               |            |                |
| 12-months                                    | 1.22                                 | 1.06, 1.41 | 0.006   | 1.22                                        | 1.07, 1.40 | 0.003   | 1.23                          | 1.07, 1.42 | 0.004          |
| 24-months                                    | 1.06                                 | 0.92, 1.22 | 0.438   | 0.93                                        | 0.81, 1.07 | 0.333   | 1.03                          | 0.89, 1.19 | 0.690          |
| 36-months                                    | 1.08                                 | 0.94, 1.25 | 0.278   | 1.07                                        | 0.94, 1.23 | 0.308   | 1.09                          | 0.95, 1.26 | 0.235          |
| LRT                                          |                                      |            | 0.0954  |                                             |            | 0.0009  |                               |            | 0.0136, 0.0908 |
| <b>Any prompt treatment</b>                  |                                      |            |         |                                             |            |         |                               |            |                |
| Overall                                      | 1.14                                 | 1.01, 1.27 | 0.031   | 1.08                                        | 0.98, 1.19 | 0.143   | 1.12                          | 1.00, 1.26 | 0.047          |
| Time-point                                   |                                      |            |         |                                             |            |         |                               |            |                |
| 12-months                                    | 1.24                                 | 1.07, 1.42 | 0.003   | 1.23                                        | 1.08, 1.40 | 0.002   | 1.24                          | 1.08, 1.43 | 0.002          |
| 24-months                                    | 1.04                                 | 0.91, 1.20 | 0.559   | 0.92                                        | 0.81, 1.04 | 0.194   | 1.00                          | 0.87, 1.16 | 0.965          |
| 36-months                                    | 1.13                                 | 0.98, 1.30 | 0.094   | 1.11                                        | 0.98, 1.27 | 0.114   | 1.13                          | 0.98, 1.30 | 0.086          |
| LRT                                          |                                      |            | 0.0651  |                                             |            | 0.0002  |                               |            | 0.0038, 0.1896 |
| <b>Recommended case management</b>           |                                      |            |         |                                             |            |         |                               |            |                |
| Overall                                      | 1.09                                 | 0.97, 1.21 | 0.153   | 1.07                                        | 0.96, 1.20 | 0.216   | 1.08                          | 0.97, 1.21 | 0.165          |
| Time-point                                   |                                      |            |         |                                             |            |         |                               |            |                |
| 12-months                                    | 1.05                                 | 0.90, 1.21 | 0.541   | 1.07                                        | 0.92, 1.25 | 0.368   | 1.06                          | 0.91, 1.24 | 0.431          |
| 24-months                                    | 1.18                                 | 1.02, 1.38 | 0.029   | 1.13                                        | 0.96, 1.32 | 0.139   | 1.16                          | 0.99, 1.36 | 0.066          |
| 36-months                                    | 1.03                                 | 0.88, 1.21 | 0.729   | 1.02                                        | 0.86, 1.20 | 0.818   | 1.03                          | 0.87, 1.21 | 0.762          |
| LRT                                          |                                      |            | 0.2395  |                                             |            | 0.6072  |                               |            | 0.3559, 0.7118 |
| <b>Prompt, recommended case management</b>   |                                      |            |         |                                             |            |         |                               |            |                |
| Overall                                      | 1.10                                 | 0.98, 1.23 | 0.110   | 1.08                                        | 0.97, 1.22 | 0.170   | 1.09                          | 0.97, 1.23 | 0.139          |
| Time-point                                   |                                      |            |         |                                             |            |         |                               |            |                |
| 12-months                                    | 1.06                                 | 0.91, 1.23 | 0.464   | 1.08                                        | 0.93, 1.27 | 0.300   | 1.08                          | 0.93, 1.26 | 0.334          |
| 24-months                                    | 1.24                                 | 1.06, 1.44 | 0.006   | 1.19                                        | 1.01, 1.40 | 0.033   | 1.21                          | 1.03, 1.43 | 0.019          |
| 36-months                                    | 1.00                                 | 0.85, 1.17 | 0.981   | 0.98                                        | 0.83, 1.15 | 0.776   | 0.98                          | 0.83, 1.16 | 0.849          |
| LRT                                          |                                      |            | 0.0448  |                                             |            | 0.1393  |                               |            | 0.2162, 0.3454 |

Notes: We assumed all child-year observations with missing outcome data experienced the event in model 1 and assumed they all did not in model 2. We performed multiple imputation by chained equations (MICE) in model 3. Following MICE, we report a joint test of coefficients between treatment arm and 24 months, and treatment arm and 36 months, in place of the likelihood ratio test (LRT).

Table S9: Heterogeneous treatment effects by cluster population size, cluster distance to nearest PHC, and household wealth on the secondary health-care utilisation outcomes at each time-point

|                                                  | 12 months |      |                   |            |         | 24 months* |      |                   |            |         | 36 months |      |                   |            |         |
|--------------------------------------------------|-----------|------|-------------------|------------|---------|------------|------|-------------------|------------|---------|-----------|------|-------------------|------------|---------|
|                                                  | ARC       | ARI  | AOR <sub>CS</sub> | 95% CIs    | p-value | ARC        | ARI  | AOR <sub>CS</sub> | 95% CIs    | p-value | ARC       | ARI  | AOR <sub>CS</sub> | 95% CIs    | p-value |
| <b>Prompt treatment within the health sector</b> |           |      |                   |            |         |            |      |                   |            |         |           |      |                   |            |         |
| <b>Cluster distance to PHC (km)</b>              |           |      |                   |            |         |            |      |                   |            |         |           |      |                   |            |         |
| <=5.0                                            | 0.61      | 0.64 | 1.12              | 0.87, 1.45 | 0.375   | ..         | ..   | 0.97              | 0.71, 1.31 | 0.833   | 0.52      | 0.53 | 1.05              | 0.83, 1.32 | 0.701   |
| >5.0                                             | 0.57      | 0.61 | 1.18              | 0.96, 1.45 | 0.107   | ..         | ..   | 1.22              | 0.94, 1.57 | 0.131   | 0.51      | 0.54 | 1.13              | 0.93, 1.38 | 0.208   |
| LRT                                              |           |      |                   |            | 0.7533  |            |      |                   |            | 0.2639  |           |      |                   |            | 0.6120  |
| <b>Cluster population size (people)</b>          |           |      |                   |            |         |            |      |                   |            |         |           |      |                   |            |         |
| <700                                             | 0.63      | 0.67 | 1.20              | 0.94, 1.53 | 0.152   | ..         | ..   | 1.21              | 0.89, 1.63 | 0.223   | 0.51      | 0.56 | 1.24              | 0.97, 1.59 | 0.081   |
| =>700                                            | 0.56      | 0.60 | 1.18              | 0.98, 1.42 | 0.087   | ..         | ..   | 1.03              | 0.80, 1.33 | 0.819   | 0.52      | 0.52 | 1.03              | 0.85, 1.24 | 0.779   |
| LRT                                              |           |      |                   |            | 0.9143  |            |      |                   |            | 0.4393  |           |      |                   |            | 0.2254  |
| <b>Household wealth</b>                          |           |      |                   |            |         |            |      |                   |            |         |           |      |                   |            |         |
| Less poor                                        | 0.60      | 0.63 | 1.14              | 0.97, 1.34 | 0.122   | ..         | ..   | 1.04              | 0.86, 1.27 | 0.663   | 0.52      | 0.54 | 1.07              | 0.91, 1.25 | 0.397   |
| Poorest                                          | 0.55      | 0.60 | 1.21              | 0.92, 1.58 | 0.169   | ..         | ..   | 1.41              | 1.04, 1.91 | 0.028   | 0.49      | 0.54 | 1.22              | 0.94, 1.57 | 0.131   |
| LRT                                              |           |      |                   |            | 0.6599  |            |      |                   |            | 0.0370  |           |      |                   |            | 0.3300  |
| <b>Any prompt treatment*</b>                     |           |      |                   |            |         |            |      |                   |            |         |           |      |                   |            |         |
| <b>Cluster distance to PHC (km)</b>              |           |      |                   |            |         |            |      |                   |            |         |           |      |                   |            |         |
| <=5.0                                            | 0.68      | 0.70 | 1.08              | 0.84, 1.38 | 0.551   | ..         | ..   | 1.09              | 0.80, 1.47 | 0.588   | 0.58      | 0.59 | 1.06              | 0.84, 1.34 | 0.619   |
| >5.0                                             | 0.63      | 0.67 | 1.21              | 0.99, 1.47 | 0.059   | ..         | ..   | 1.08              | 0.85, 1.38 | 0.538   | 0.55      | 0.59 | 1.16              | 0.96, 1.41 | 0.121   |
| LRT                                              |           |      |                   |            | 0.4810  |            |      |                   |            | 0.9751  |           |      |                   |            | 0.5435  |
| <b>Cluster population size (people)</b>          |           |      |                   |            |         |            |      |                   |            |         |           |      |                   |            |         |
| <700                                             | 0.67      | 0.71 | 1.22              | 0.95, 1.56 | 0.115   | ..         | ..   | 1.30              | 1.00, 1.75 | 0.083   | 0.56      | 0.61 | 1.23              | 0.96, 1.58 | 0.094   |
| =>700                                            | 0.64      | 0.67 | 1.14              | 0.95, 1.37 | 0.170   | ..         | ..   | 0.95              | 0.75, 1.21 | 0.677   | 0.57      | 0.58 | 1.06              | 0.88, 1.28 | 0.533   |
| LRT                                              |           |      |                   |            | 0.6550  |            |      |                   |            | 0.1039  |           |      |                   |            | 0.3380  |
| <b>Household wealth</b>                          |           |      |                   |            |         |            |      |                   |            |         |           |      |                   |            |         |
| Less poor                                        | 0.66      | 0.68 | 1.12              | 0.95, 1.31 | 0.181   | ..         | ..   | 1.06              | 0.87, 1.29 | 0.557   | 0.57      | 0.59 | 1.08              | 0.92, 1.26 | 0.346   |
| Poorest                                          | 0.60      | 0.66 | 1.30              | 0.99, 1.70 | 0.056   | ..         | ..   | 1.17              | 0.87, 1.59 | 0.298   | 0.54      | 0.61 | 1.30              | 1.01, 1.68 | 0.043   |
| LRT                                              |           |      |                   |            | 0.2671  |            |      |                   |            | 0.4759  |           |      |                   |            | 0.1536  |
| <b>Health sector evaluation</b>                  |           |      |                   |            |         |            |      |                   |            |         |           |      |                   |            |         |
| <b>Cluster distance to PHC (km)</b>              |           |      |                   |            |         |            |      |                   |            |         |           |      |                   |            |         |
| <=5.0                                            | 0.66      | 0.67 | 1.07              | 0.82, 1.39 | 0.613   | 0.68       | 0.67 | 0.93              | 0.68, 1.26 | 0.637   | 0.57      | 0.59 | 1.05              | 0.84, 1.33 | 0.659   |
| >5.0                                             | 0.62      | 0.66 | 1.17              | 0.95, 1.45 | 0.129   | 0.61       | 0.66 | 1.22              | 0.94, 1.57 | 0.129   | 0.57      | 0.61 | 1.18              | 0.97, 1.43 | 0.100   |
| LRT                                              |           |      |                   |            | 0.5819  |            |      |                   |            | 0.1846  |           |      |                   |            | 0.4748  |
| <b>Cluster population size (people)</b>          |           |      |                   |            |         |            |      |                   |            |         |           |      |                   |            |         |
| <700                                             | 0.67      | 0.72 | 1.27              | 0.98, 1.63 | 0.065   | 0.67       | 0.68 | 1.07              | 0.79, 1.45 | 0.668   | 0.57      | 0.64 | 1.36              | 1.07, 1.73 | 0.013   |
| =>700                                            | 0.62      | 0.64 | 1.09              | 0.90, 1.32 | 0.357   | 0.62       | 0.65 | 1.11              | 0.86, 1.44 | 0.403   | 0.57      | 0.58 | 1.03              | 0.86, 1.23 | 0.770   |

|                                      |      |      |      |            |        |      |      |      |            |        |        |      |      |            |        |        |
|--------------------------------------|------|------|------|------------|--------|------|------|------|------------|--------|--------|------|------|------------|--------|--------|
| LRT                                  |      |      |      |            | 0.3613 |      |      |      |            |        | 0.8374 |      |      |            |        | 0.0725 |
| Household wealth                     |      |      |      |            |        |      |      |      |            |        |        |      |      |            |        |        |
| Less poor                            | 0.64 | 0.67 | 1.11 | 0.94, 1.31 | 0.239  | 0.65 | 0.66 | 1.02 | 0.83, 1.25 | 0.847  | 0.57   | 0.60 | 1.13 | 0.97, 1.33 | 0.128  |        |
| Poorest                              | 0.61 | 0.65 | 1.20 | 0.91, 1.58 | 0.196  | 0.59 | 0.68 | 1.47 | 1.09, 1.99 | 0.012  | 0.58   | 0.60 | 1.12 | 0.87, 1.44 | 0.390  |        |
| LRT                                  |      |      |      |            | 0.5600 |      |      |      |            | 0.0098 |        |      |      |            | 0.9338 |        |
| Any care                             |      |      |      |            |        |      |      |      |            |        |        |      |      |            |        |        |
| Cluster distance to PHC (km)         |      |      |      |            |        |      |      |      |            |        |        |      |      |            |        |        |
| <=5.0                                | 0.73 | 0.73 | 1.03 | 0.79, 1.33 | 0.844  | 0.74 | 0.75 | 1.05 | 0.79, 1.38 | 0.743  | 0.65   | 0.67 | 1.10 | 0.88, 1.37 | 0.395  |        |
| >5.0                                 | 0.69 | 0.73 | 1.20 | 0.98, 1.48 | 0.076  | 0.72 | 0.75 | 1.17 | 0.92, 1.47 | 0.195  | 0.61   | 0.66 | 1.21 | 1.01, 1.45 | 0.040  |        |
| LRT                                  |      |      |      |            | 0.3460 |      |      |      |            | 0.5663 |        |      |      |            | 0.5105 |        |
| Cluster population size (people)     |      |      |      |            |        |      |      |      |            |        |        |      |      |            |        |        |
| <700                                 | 0.72 | 0.77 | 1.35 | 1.04, 1.75 | 0.024  | 0.73 | 0.77 | 1.22 | 0.92, 1.63 | 0.173  | 0.63   | 0.70 | 1.38 | 1.09, 1.74 | 0.007  |        |
| =>700                                | 0.70 | 0.71 | 1.05 | 0.86, 1.27 | 0.638  | 0.73 | 0.74 | 1.06 | 0.85, 1.33 | 0.592  | 0.63   | 0.65 | 1.08 | 0.92, 1.27 | 0.358  |        |
| LRT                                  |      |      |      |            | 0.1258 |      |      |      |            | 0.4526 |        |      |      |            | 0.0945 |        |
| Household wealth                     |      |      |      |            |        |      |      |      |            |        |        |      |      |            |        |        |
| Less poor                            | 0.71 | 0.73 | 1.08 | 0.91, 1.38 | 0.386  | 0.73 | 0.75 | 1.08 | 0.90, 1.29 | 0.435  | 0.63   | 0.66 | 1.16 | 1.00, 1.34 | 0.052  |        |
| Poorest                              | 0.66 | 0.72 | 1.34 | 1.01, 1.78 | 0.043  | 0.71 | 0.76 | 1.32 | 0.97, 1.78 | 0.075  | 0.63   | 0.67 | 1.20 | 0.93, 1.54 | 0.165  |        |
| LRT                                  |      |      |      |            | 0.1299 |      |      |      |            | 0.1850 |        |      |      |            | 0.8047 |        |
| Recommended case management*         |      |      |      |            |        |      |      |      |            |        |        |      |      |            |        |        |
| Cluster distance to PHC (km)         |      |      |      |            |        |      |      |      |            |        |        |      |      |            |        |        |
| <=5.0                                | 0.48 | 0.46 | 0.93 | 0.72, 1.19 | 0.552  | ..   | ..   | 1.22 | 0.88, 1.69 | 0.226  | 0.35   | 0.35 | 0.97 | 0.78, 1.21 | 0.782  |        |
| >5.0                                 | 0.44 | 0.46 | 1.15 | 0.94, 1.40 | 0.171  | ..   | ..   | 1.26 | 0.95, 1.66 | 0.105  | 0.34   | 0.35 | 1.06 | 0.88, 1.28 | 0.522  |        |
| LRT                                  |      |      |      |            | 0.1870 |      |      |      |            | 0.8927 |        |      |      |            | 0.5315 |        |
| Cluster population size (people)     |      |      |      |            |        |      |      |      |            |        |        |      |      |            |        |        |
| <700                                 | 0.47 | 0.50 | 1.20 | 0.91, 1.59 | 0.187  | ..   | ..   | 1.57 | 1.11, 2.23 | 0.012  | 0.38   | 0.37 | 0.96 | 0.73, 1.26 | 0.758  |        |
| =>700                                | 0.45 | 0.45 | 1.01 | 0.85, 1.21 | 0.882  | ..   | ..   | 1.09 | 0.84, 1.41 | 0.537  | 0.33   | 0.34 | 1.06 | 0.90, 1.25 | 0.473  |        |
| LRT                                  |      |      |      |            | 0.3053 |      |      |      |            | 0.0951 |        |      |      |            | 0.5247 |        |
| Household wealth                     |      |      |      |            |        |      |      |      |            |        |        |      |      |            |        |        |
| Less poor                            | 0.46 | 0.46 | 1.04 | 0.88, 1.22 | 0.687  | ..   | ..   | 1.18 | 0.94, 1.47 | 0.147  | 0.34   | 0.35 | 1.04 | 0.89, 1.22 | 0.592  |        |
| Poorest                              | 0.44 | 0.45 | 1.08 | 0.77, 1.50 | 0.661  | ..   | ..   | 1.57 | 1.07, 2.30 | 0.021  | 0.36   | 0.35 | 0.94 | 0.69, 1.28 | 0.677  |        |
| LRT                                  |      |      |      |            | 0.8238 |      |      |      |            | 0.1372 |        |      |      |            | 0.5335 |        |
| Prompt, recommended case management* |      |      |      |            |        |      |      |      |            |        |        |      |      |            |        |        |
| Cluster distance to PHC (km)         |      |      |      |            |        |      |      |      |            |        |        |      |      |            |        |        |
| <=5.0                                | 0.46 | 0.44 | 0.91 | 0.71, 1.17 | 0.479  | ..   | ..   | 1.29 | 0.93, 1.80 | 0.124  | 0.31   | 0.30 | 0.97 | 0.77, 1.22 | 0.797  |        |
| >5.0                                 | 0.40 | 0.43 | 1.17 | 0.96, 1.43 | 0.125  | ..   | ..   | 1.35 | 1.01, 1.79 | 0.040  | 0.30   | 0.30 | 0.99 | 0.82, 1.20 | 0.930  |        |
| LRT                                  |      |      |      |            | 0.1333 |      |      |      |            | 0.8550 |        |      |      |            | 0.8884 |        |
| Cluster population size (people)     |      |      |      |            |        |      |      |      |            |        |        |      |      |            |        |        |
| <700                                 | 0.44 | 0.46 | 1.09 | 0.83, 1.44 | 0.539  | ..   | ..   | 1.74 | 1.22, 2.49 | 0.002  | 0.34   | 0.32 | 0.90 | 0.69, 1.19 | 0.477  |        |

|                  |      |      |      |            |        |    |    |      |            |        |      |      |      |            |        |
|------------------|------|------|------|------------|--------|----|----|------|------------|--------|------|------|------|------------|--------|
| =>700            | 0.41 | 0.42 | 1.07 | 0.89, 1.29 | 0.480  | .. | .. | 1.12 | 0.86, 1.47 | 0.396  | 0.29 | 0.29 | 1.03 | 0.87, 1.22 | 0.740  |
| LRT              |      |      |      |            | 0.9053 |    |    |      |            | 0.0573 |      |      |      |            | 0.4386 |
| Household wealth |      |      |      |            |        |    |    |      |            |        |      |      |      |            |        |
| Less poor        | 0.43 | 0.43 | 1.03 | 0.87, 1.23 | 0.703  | .. | .. | 1.24 | 0.99, 1.56 | 0.062  | 0.30 | 0.30 | 0.96 | 0.82, 1.13 | 0.623  |
| Poorest          | 0.40 | 0.42 | 1.12 | 0.80, 1.56 | 0.500  | .. | .. | 1.72 | 1.18, 2.52 | 0.005  | 0.30 | 0.31 | 1.06 | 0.77, 1.45 | 0.730  |
| LRT              |      |      |      |            | 0.6491 |    |    |      |            | 0.0871 |      |      |      |            | 0.5908 |

Notes: For every outcome, we ran three separate models, one for each of the predefined effect modifiers that included an interaction term between treatment arm and the modifier, on each of the three annual subsets. We treated each follow-up child sample separately to avoid the complexity that would have been introduced by a triple interaction term between arm, modifier, and time-point. All models controlled for the same covariates as the main model (table 3); we removed the baseline cluster-level summary of wealth in the models that assessed heterogeneous effects by this variable at the household level. We report the results of the likelihood ratio tests (LRT) for interaction between arm and modifier in each model.

\*On the 24-month subset, we performed multiple imputation by chained equations prior to assessing heterogeneous treatment effects on the following outcomes: any prompt treatment, recommended case management, and prompt, recommended case management. In these cases, we were unable to estimate absolute risks in each arm using the margins command and we used the mi test postestimation command to perform a joint test of coefficients in place of the LRT.

Table S10: Heterogeneous treatment effects by cluster population size, cluster distance to nearest PHC, and household wealth for primary and secondary health-care utilisation outcomes during the three-year trial period overall

| Outcome                                   | ARC  | ART  | OR <sub>CS</sub> | 95% CIs    | p-value | Outcome                     | ARC  | ART  | OR <sub>CS</sub> | 95% CIs    | p-value |
|-------------------------------------------|------|------|------------------|------------|---------|-----------------------------|------|------|------------------|------------|---------|
| Prompt treatment within the health sector |      |      |                  |            |         | Prompt treatment            |      |      |                  |            |         |
| Cluster distance to PHC                   |      |      |                  |            |         | Cluster distance to PHC     |      |      |                  |            |         |
| <=5.0 km                                  | 0.54 | 0.55 | 1.01             | 0.84, 1.22 | 0.918   | <=5.0 km                    | 0.61 | 0.62 | 1.05             | 0.88, 1.26 | 0.577   |
| >5.0 km                                   | 0.50 | 0.54 | 1.18             | 1.01, 1.38 | 0.039   | >5.0 km                     | 0.57 | 0.61 | 1.17             | 1.01, 1.36 | 0.037   |
| LRT                                       |      |      |                  |            | 0.2193  | LRT                         |      |      |                  |            | 0.3723  |
| Cluster population size                   |      |      |                  |            |         | Cluster population size     |      |      |                  |            |         |
| <700 people                               | 0.53 | 0.57 | 1.18             | 0.99, 1.41 | 0.072   | <700 people                 | 0.59 | 0.63 | 1.23             | 1.03, 1.46 | 0.021   |
| =>700                                     | 0.51 | 0.53 | 1.07             | 0.91, 1.25 | 0.419   | =>700                       | 0.59 | 0.60 | 1.05             | 0.91, 1.22 | 0.520   |
| LRT                                       |      |      |                  |            | 0.4132  | LRT                         |      |      |                  |            | 0.1826  |
| Household wealth                          |      |      |                  |            |         | Household wealth            |      |      |                  |            |         |
| Less poor                                 | 0.53 | 0.55 | 1.08             | 0.95, 1.22 | 0.243   | Less poor                   | 0.59 | 0.61 | 1.09             | 0.97, 1.23 | 0.154   |
| Poorest quintile                          | 0.49 | 0.54 | 1.23             | 1.03, 1.46 | 0.022   | Poorest quintile            | 0.56 | 0.61 | 1.25             | 1.05, 1.48 | 0.012   |
| LRT                                       |      |      |                  |            | 0.1000  | LRT                         |      |      |                  |            | 0.0917  |
| Care within the health sector             |      |      |                  |            |         | Any care                    |      |      |                  |            |         |
| Cluster distance to PHC                   |      |      |                  |            |         | Cluster distance to PHC     |      |      |                  |            |         |
| <=5.0 km                                  | 0.64 | 0.64 | 1.01             | 0.84, 1.23 | 0.886   | <=5.0 km                    | 0.71 | 0.72 | 1.07             | 0.89, 1.28 | 0.480   |
| >5.0 km                                   | 0.60 | 0.64 | 1.19             | 1.02, 1.40 | 0.026   | >5.0 km                     | 0.67 | 0.71 | 1.21             | 1.04, 1.40 | 0.011   |
| LRT                                       |      |      |                  |            | 0.1940  | LRT                         |      |      |                  |            | 0.2928  |
| Cluster population size                   |      |      |                  |            |         | Cluster population size     |      |      |                  |            |         |
| <700 people                               | 0.63 | 0.68 | 1.21             | 1.02, 1.44 | 0.032   | <700 people                 | 0.69 | 0.74 | 1.31             | 0.11, 1.56 | 0.002   |
| =>700                                     | 0.61 | 0.62 | 1.07             | 0.92, 1.24 | 0.398   | =>700                       | 0.69 | 0.70 | 1.06             | 0.92, 1.22 | 0.436   |
| LRT                                       |      |      |                  |            | 0.2868  | LRT                         |      |      |                  |            | 0.0589  |
| Household wealth                          |      |      |                  |            |         | Household wealth            |      |      |                  |            |         |
| Less poor                                 | 0.63 | 0.64 | 1.09             | 0.96, 1.23 | 0.179   | Less poor                   | 0.69 | 0.71 | 1.12             | 1.00, 1.26 | 0.060   |
| Poorest quintile                          | 0.60 | 0.64 | 1.24             | 1.04, 1.47 | 0.015   | Poorest quintile            | 0.67 | 0.72 | 1.28             | 1.07, 1.52 | 0.006   |
| LRT                                       |      |      |                  |            | 0.0959  | LRT                         |      |      |                  |            | 0.1061  |
| Prompt, recommended case management       |      |      |                  |            |         | Recommended case management |      |      |                  |            |         |
| Cluster distance to PHC                   |      |      |                  |            |         | Cluster distance to PHC     |      |      |                  |            |         |
| <=5.0 km                                  | 0.38 | 0.39 | 1.03             | 0.86, 1.24 | 0.725   | <=5.0 km                    | 0.43 | 0.43 | 1.02             | 0.85, 1.22 | 0.834   |
| >5.0 km                                   | 0.34 | 0.37 | 1.14             | 0.98, 1.32 | 0.095   | >5.0 km                     | 0.40 | 0.42 | 1.12             | 0.97, 1.20 | 0.120   |
| LRT                                       |      |      |                  |            | 0.4277  | LRT                         |      |      |                  |            | 0.4078  |
| Cluster population size                   |      |      |                  |            |         | Cluster population size     |      |      |                  |            |         |
| <700 people                               | 0.37 | 0.40 | 1.16             | 0.96, 1.40 | 0.114   | <700 people                 | 0.42 | 0.45 | 1.17             | 0.97, 1.41 | 0.092   |
| =>700                                     | 0.35 | 0.36 | 1.06             | 0.92, 1.22 | 0.439   | =>700                       | 0.40 | 0.41 | 1.04             | 0.90, 1.19 | 0.615   |

|                  |      |      |      |            |        |                  |      |      |      |            |        |
|------------------|------|------|------|------------|--------|------------------|------|------|------|------------|--------|
| LRT              |      |      |      |            | 0.4290 | LRT              |      |      |      |            | 0.2954 |
| Household wealth |      |      |      |            |        | Household wealth |      |      |      |            |        |
| Less poor        | 0.36 | 0.37 | 1.05 | 0.93, 1.19 | 0.400  | Less poor        | 0.41 | 0.42 | 1.06 | 0.94, 1.20 | 0.310  |
| Poorest quintile | 0.35 | 0.38 | 1.23 | 1.00, 1.51 | 0.050  | Poorest quintile | 0.40 | 0.42 | 1.12 | 0.91, 1.38 | 0.267  |
| LRT              |      |      |      |            | 0.1446 | LRT              |      |      |      |            | 0.6117 |

Table S11: Characteristics of sick child-year observations that met the per-protocol threshold and those that did not in each arm.

|                                        | Intervention                       |          |                                        |          | Control                            |          |                                        |          |
|----------------------------------------|------------------------------------|----------|----------------------------------------|----------|------------------------------------|----------|----------------------------------------|----------|
|                                        | Per-protocol<br>N=4864 child-years |          | Not per-protocol<br>N=5478 child-years |          | Per-protocol<br>N=7561 child-years |          | Not per-protocol<br>N=2098 child-years |          |
|                                        | N                                  | %        | N                                      | %        |                                    |          |                                        |          |
| <i>Catchment area</i>                  |                                    |          |                                        |          |                                    |          |                                        |          |
| Dimbal                                 | 776                                | 16.0     | 984                                    | 18.0     | 2294                               | 30.3     | 491                                    | 23.4     |
| Lessagou                               | 853                                | 17.5     | 1183                                   | 21.6     | 862                                | 11.4     | 287                                    | 13.7     |
| Doundé                                 | 784                                | 16.1     | 730                                    | 13.3     | 736                                | 9.7      | 234                                    | 11.2     |
| Ende                                   | 276                                | 5.7      | 222                                    | 4.1      | 344                                | 4.6      | 80                                     | 3.8      |
| Soubala                                | 938                                | 19.3     | 938                                    | 17.1     | 1688                               | 22.3     | 467                                    | 22.3     |
| Kanibozon                              | 639                                | 13.1     | 625                                    | 11.4     | 479                                | 6.3      | 157                                    | 7.5      |
| Koulongon                              | 598                                | 12.3     | 796                                    | 14.5     | 1158                               | 15.3     | 382                                    | 18.2     |
| <i>Household-level characteristics</i> |                                    |          |                                        |          |                                    |          |                                        |          |
| Distance to PHC                        |                                    |          |                                        |          |                                    |          |                                        |          |
| Median/IQR (km)                        | 6.1                                | 3.9, 7.6 | 6.1                                    | 4.0, 7.7 | 5.4                                | 2.7, 8.0 | 5.5                                    | 3.1, 7.8 |
| Household size                         |                                    |          |                                        |          |                                    |          |                                        |          |
| Median/IQR                             | 8                                  | 6, 12    | 8                                      | 5, 11    | 8                                  | 5, 11    | 9                                      | 6, 12    |
| Household wealth quintile              |                                    |          |                                        |          |                                    |          |                                        |          |
| Poorest                                | 859                                | 17.7     | 1038                                   | 19.0     | 1303                               | 17.2     | 337                                    | 16.1     |
| Poor                                   | 874                                | 18.0     | 994                                    | 18.2     | 1536                               | 20.3     | 398                                    | 19.0     |
| Middle                                 | 950                                | 19.5     | 1169                                   | 21.3     | 1508                               | 19.9     | 424                                    | 20.2     |
| Rich                                   | 1009                               | 20.7     | 1151                                   | 21.0     | 1647                               | 21.8     | 468                                    | 22.3     |
| Richest                                | 1154                               | 23.7     | 1105                                   | 20.2     | 1549                               | 20.5     | 468                                    | 22.3     |
| Missing                                | 18                                 | 0.4      | 21                                     | 0.4      | 18                                 | 0.2      | 3                                      | 0.1      |
| <i>Mother-level characteristics</i>    |                                    |          |                                        |          |                                    |          |                                        |          |
| Mother's marital status                |                                    |          |                                        |          |                                    |          |                                        |          |
| Not married                            | 49                                 | 1.0      | 53                                     | 1.0      | 72                                 | 1.0      | 15                                     | 0.7      |
| Polygynous                             | 2521                               | 51.8     | 2217                                   | 40.5     | 3243                               | 42.9     | 1109                                   | 52.9     |
| Monogamous                             | 2291                               | 47.1     | 3208                                   | 58.6     | 4244                               | 56.1     | 973                                    | 46.4     |
| Missing                                | 3                                  | 0.1      | 53                                     | 1.0      | 2                                  | 0.0      | 1                                      | 0.1      |
| Mother's parity (# live births)        |                                    |          |                                        |          |                                    |          |                                        |          |
| Median/IQR                             | 5                                  | 3, 7     | 4                                      | 3, 7     | 4                                  | 3, 7     | 5                                      | 3, 7     |
| 1-2                                    | 1017                               | 20.9     | 1341                                   | 24.5     | 1771                               | 23.4     | 446                                    | 21.3     |



|                                           |      |        |      |        |      |        |      |        |
|-------------------------------------------|------|--------|------|--------|------|--------|------|--------|
| 3-4                                       | 1317 | 27.1   | 1479 | 27.0   | 2124 | 28.1   | 567  | 27.0   |
| 5-6                                       | 1204 | 24.8   | 1247 | 22.8   | 1727 | 22.8   | 516  | 24.6   |
| 7+                                        | 1326 | 27.3   | 1411 | 25.8   | 1939 | 25.6   | 569  | 27.1   |
| <b>Mother's education</b>                 |      |        |      |        |      |        |      |        |
| None                                      | 4140 | 85.1   | 4583 | 83.7   | 6395 | 84.6   | 1790 | 85.3   |
| Any                                       | 404  | 8.3    | 492  | 9.0    | 750  | 9.9    | 190  | 9.1    |
| Missing                                   | 320  | 6.6    | 403  | 7.4    | 416  | 5.5    | 118  | 5.6    |
| <b>Mother participates in paid labour</b> |      |        |      |        |      |        |      |        |
| No                                        | 3921 | 80.6   | 4533 | 82.8   | 6323 | 83.6   | 1680 | 80.1   |
| Yes                                       | 936  | 19.2   | 940  | 17.2   | 1230 | 16.3   | 407  | 19.4   |
| Missing                                   | 7    | 0.1    | 5    | 0.1    | 8    | 0.1    | 11   | 0.5    |
| <b>Mother's mobility</b>                  |      |        |      |        |      |        |      |        |
| No place                                  | 1420 | 29.2   | 1449 | 26.5   | 2231 | 29.5   | 592  | 28.2   |
| Any place but none alone                  | 743  | 15.3   | 945  | 17.3   | 1309 | 17.3   | 357  | 17.0   |
| Any place alone                           | 2343 | 48.2   | 2613 | 47.7   | 3533 | 46.7   | 1012 | 48.2   |
| Missing                                   | 358  | 7.4    | 471  | 8.6    | 488  | 6.5    | 137  | 6.5    |
| <b>Mother's decision-making</b>           |      |        |      |        |      |        |      |        |
| None                                      | 3452 | 71.0   | 3687 | 67.3   | 5036 | 66.6   | 1570 | 74.8   |
| Any                                       | 1409 | 29.0   | 1786 | 32.6   | 2519 | 33.3   | 525  | 25.0   |
| Missing                                   | 3    | 0.1    | 5    | 0.1    | 6    | 0.1    | 3    | 0.1    |
| <i>Child-level characteristics</i>        |      |        |      |        |      |        |      |        |
| <b>Sex</b>                                |      |        |      |        |      |        |      |        |
| Male                                      | 2556 | 52.6   | 2733 | 49.9   | 3911 | 51.7   | 1074 | 51.2   |
| Female                                    | 2308 | 47.5   | 2745 | 50.1   | 3650 | 48.3   | 1024 | 48.8   |
| <b>Age (in months)</b>                    |      |        |      |        |      |        |      |        |
| Median/IQR                                | 28   | 14, 42 | 27   | 14, 41 | 27   | 14, 41 | 27   | 14, 42 |
| 0-11                                      | 952  | 19.6   | 1072 | 19.6   | 1476 | 19.5   | 402  | 19.2   |
| 12-23                                     | 1095 | 22.5   | 1329 | 24.3   | 1796 | 23.8   | 506  | 24.1   |
| 24-35                                     | 1046 | 21.5   | 1138 | 20.8   | 1633 | 21.6   | 423  | 20.2   |
| 36-59                                     | 1771 | 36.4   | 1939 | 35.4   | 2656 | 35.1   | 767  | 36.6   |

Table S12: Per-protocol subgroup estimates for the primary and secondary health-care utilisation outcomes, excluding observations in the intervention arm that did not receive at least two CHW home visits as well as observations in the control arm that received any CHW home visit in the month preceding the survey, during the three-year trial period overall<sup>1</sup> and at each follow-up time-point<sup>2</sup>

| Outcome                                              | ARC  | ARI  | AOR <sub>CS</sub><br>(C vs I) | 95% CIs    | p-value |
|------------------------------------------------------|------|------|-------------------------------|------------|---------|
| Prompt treatment within the health sector (N=11,529) |      |      |                               |            |         |
| Overall <sup>1</sup>                                 | 0.52 | 0.57 | 1.22                          | 1.06, 1.41 | 0.006   |
| Time-point <sup>2</sup>                              |      |      |                               |            |         |
| 12 months                                            | 0.58 | 0.66 | 1.44                          | 1.21, 1.72 | <0.001  |
| 24 months                                            | 0.46 | 0.47 | 1.08                          | 0.90, 1.30 | 0.414   |
| 36 months                                            | 0.52 | 0.55 | 1.14                          | 0.95, 1.36 | 0.175   |
| Likelihood ratio test                                |      |      |                               |            | 0.0065  |
| Prompt treatment (N=11,524)                          |      |      |                               |            |         |
| Overall <sup>1</sup>                                 | 0.59 | 0.64 | 1.25                          | 1.09, 1.44 | 0.002   |
| Time-point <sup>2</sup>                              |      |      |                               |            |         |
| 12 months                                            | 0.64 | 0.71 | 1.42                          | 1.19, 1.70 | <0.001  |
| 24 months                                            | 0.55 | 0.58 | 1.09                          | 0.91, 1.32 | 0.349   |
| 36 months                                            | 0.56 | 0.61 | 1.24                          | 1.03, 1.49 | 0.021   |
| Likelihood ratio test                                |      |      |                               |            | 0.0336  |
| Health sector evaluation (N=12,416)                  |      |      |                               |            |         |
| Overall <sup>1</sup>                                 | 0.62 | 0.68 | 1.28                          | 1.11, 1.48 | 0.001   |
| Time-point <sup>2</sup>                              |      |      |                               |            |         |
| 12 months                                            | 0.63 | 0.70 | 1.38                          | 1.16, 1.66 | <0.001  |
| 24 months                                            | 0.65 | 0.71 | 1.30                          | 1.09, 1.57 | 0.004   |
| 36 months                                            | 0.58 | 0.61 | 1.15                          | 0.95, 1.38 | 0.147   |
| Likelihood ratio test                                |      |      |                               |            | 0.1558  |
| Any care (N=9039)                                    |      |      |                               |            |         |
| Overall <sup>1</sup>                                 | 0.69 | 0.75 | 1.33                          | 1.15, 1.53 | <0.001  |
| Time-point <sup>2</sup>                              |      |      |                               |            |         |
| 12 months                                            | 0.71 | 0.76 | 1.34                          | 1.12, 1.61 | 0.002   |
| 24 months                                            | 0.74 | 0.79 | 1.34                          | 1.11, 1.61 | 0.003   |
| 36 months                                            | 0.63 | 0.69 | 1.30                          | 1.08, 1.56 | 0.006   |
| Likelihood ratio test                                |      |      |                               |            | 0.9349  |
| Recommended case management (N=9039)                 |      |      |                               |            |         |
| Overall <sup>1</sup>                                 | 0.41 | 0.45 | 0.20                          | 0.06, 0.34 | 0.006   |
| Time-point <sup>2</sup>                              |      |      |                               |            |         |
| 12 months                                            | 0.46 | 0.49 | 1.21                          | 0.99, 1.47 | 0.062   |
| 24 months                                            | 0.39 | 0.45 | 1.39                          | 1.14, 1.70 | 0.001   |
| 36 months                                            | 0.38 | 0.39 | 1.06                          | 0.86, 1.32 | 0.583   |
| Likelihood ratio test                                |      |      |                               |            | 0.1236  |
| Prompt, recommended case management (N=9039)         |      |      |                               |            |         |
| Overall <sup>1</sup>                                 | 0.36 | 0.39 | 1.19                          | 1.03, 1.37 | 0.018   |
| Time-point <sup>2</sup>                              |      |      |                               |            |         |
| 12 months                                            | 0.42 | 0.46 | 1.22                          | 1.01, 1.48 | 0.043   |
| 24 months                                            | 0.31 | 0.36 | 1.31                          | 1.07, 1.60 | 0.008   |
| 36 months                                            | 0.33 | 0.33 | 1.02                          | 0.82, 1.26 | 0.888   |
| Likelihood ratio test                                |      |      |                               |            | 0.1437  |

Figure S3: Box plot representing the variability in cluster summaries of the prevalence outcomes in the intervention and control arms at each time-point

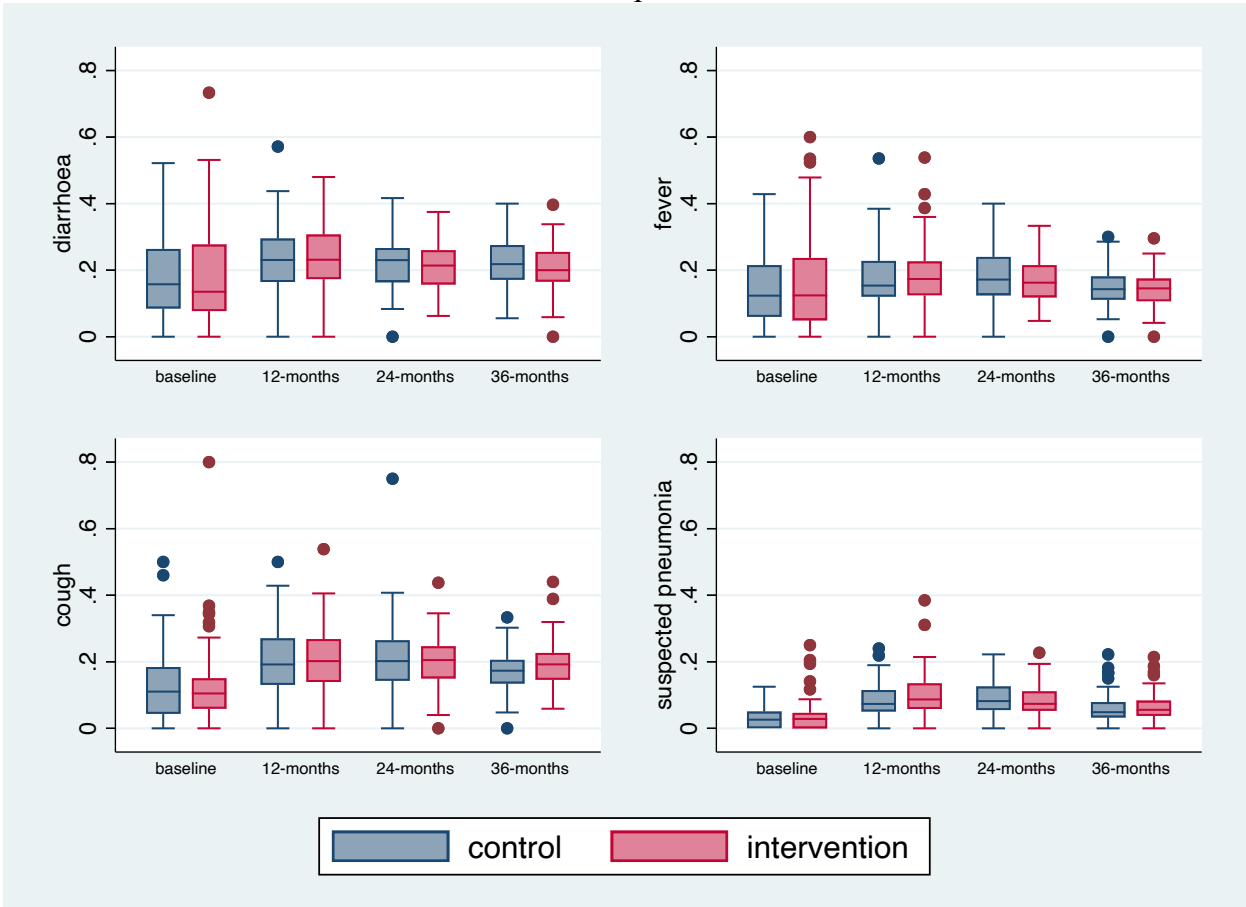

Table S13: Cluster-specific intervention effects on prevalence outcomes, including absolute risks in each arm, during the three-year trial period overall<sup>1</sup> and at each follow-up time-point<sup>2</sup>

| Outcome                               | ARC  | ARI  | AOR <sub>CS</sub><br>(C vs I) | 95% CIs      | p-value |
|---------------------------------------|------|------|-------------------------------|--------------|---------|
| <b>Fever (N=46,755)</b>               |      |      |                               |              |         |
| Overall <sup>1</sup>                  | 0.17 | 0.17 | 0.98                          | 0.89, 1.07   | 0.614   |
| Time-point <sup>2</sup>               |      |      |                               |              |         |
| 12 months                             | 0.18 | 0.18 | 1.02                          | 0.91, 1.14   | 0.770   |
| 24 months                             | 0.18 | 0.17 | 0.91                          | 0.81, 1.03   | 0.125   |
| 36 months                             | 0.15 | 0.15 | 1.00                          | 0.89, 1.13   | 0.981   |
| Cluster level ICC                     |      |      |                               |              |         |
| Control                               |      |      | 0.011                         | 0.006, 0.020 |         |
| Intervention                          |      |      | 0.009                         | 0.005, 0.016 |         |
| Child-within-cluster level ICC        |      |      |                               |              |         |
| Control                               |      |      | 0.107                         | 0.075, 0.150 |         |
| Intervention                          |      |      | 0.051                         | 0.025, 0.102 |         |
| Likelihood ratio test                 |      |      |                               |              | 0.1702  |
| <b>Diarrhoea (N=46,758)</b>           |      |      |                               |              |         |
| Overall <sup>1</sup>                  | 0.22 | 0.22 | 1.00                          | 0.91, 1.09   | 0.989   |
| Time-point <sup>2</sup>               |      |      |                               |              |         |
| 12 months                             | 0.24 | 0.25 | 1.06                          | 0.95, 1.19   | 0.273   |
| 24 months                             | 0.22 | 0.21 | 0.97                          | 0.87, 1.09   | 0.636   |
| 36 months                             | 0.22 | 0.21 | 0.95                          | 0.85, 1.07   | 0.428   |
| ICC (95% CIs)                         |      |      |                               |              |         |
| Control                               |      |      | 0.007                         | 0.003, 0.014 |         |
| Intervention                          |      |      | 0.010                         | 0.006, 0.017 |         |
| Child-within-cluster level ICC        |      |      |                               |              |         |
| Control                               |      |      | 0.150                         | 0.121, 0.184 |         |
| Intervention                          |      |      | 0.141                         | 0.113, 0.175 |         |
| Likelihood ratio test                 |      |      |                               |              | 0.1409  |
| <b>Cough (N=46,771)</b>               |      |      |                               |              |         |
| Overall <sup>1</sup>                  | 0.19 | 0.20 | 1.04                          | 0.95, 1.14   | 0.366   |
| Time-point <sup>2</sup>               |      |      |                               |              |         |
| 12 months                             | 0.19 | 0.21 | 1.16                          | 1.04, 1.30   | 0.010   |
| 24 months                             | 0.20 | 0.20 | 1.01                          | 0.90, 1.13   | 0.914   |
| 36 months                             | 0.19 | 0.18 | 0.96                          | 0.86, 1.08   | 0.516   |
| ICC (95% CIs)                         |      |      |                               |              |         |
| Control                               |      |      | 0.015                         | 0.008, 0.026 |         |
| Intervention                          |      |      | 0.006                         | 0.003, 0.012 |         |
| Child-within-cluster level ICC        |      |      |                               |              |         |
| Control                               |      |      | 0.108                         | 0.077, 0.148 |         |
| Intervention                          |      |      | 0.107                         | 0.078, 0.144 |         |
| Likelihood ratio test                 |      |      |                               |              | 0.0057  |
| <b>Suspected pneumonia (N=46,733)</b> |      |      |                               |              |         |
| Overall <sup>1</sup>                  | 0.08 | 0.08 | 1.06                          | 0.96, 1.18   | 0.244   |
| Time-point <sup>2</sup>               |      |      |                               |              |         |

|                                |      |      |       |              |        |
|--------------------------------|------|------|-------|--------------|--------|
| 12 months                      | 0.08 | 0.10 | 1.22  | 1.07, 1.40   | 0.003  |
| 24 months                      | 0.08 | 0.08 | 0.98  | 0.85, 1.13   | 0.796  |
| 36 months                      | 0.06 | 0.06 | 0.96  | 0.82, 1.12   | 0.603  |
| ICC (95% CIs)                  |      |      |       |              |        |
| Control                        |      |      | 0.005 | 0.001, 0.019 |        |
| Intervention                   |      |      | 0.010 | 0.004, 0.022 |        |
| Child-within-cluster level ICC |      |      |       |              |        |
| Control                        |      |      | 0.051 | 0.012, 0.192 |        |
| Intervention                   |      |      | 0.035 | 0.006, 0.195 |        |
| Likelihood ratio test          |      |      |       |              | 0.0058 |

Table S14: Heterogeneous treatment effects by cluster population size, distance to nearest PHC, and household wealth on the prevalence outcomes at each time-point

|                                  | 12 months |      |                   |            |         | 24 months |      |                   |            |         | 36 months |      |                   |            |         |
|----------------------------------|-----------|------|-------------------|------------|---------|-----------|------|-------------------|------------|---------|-----------|------|-------------------|------------|---------|
|                                  | ARC       | ARI  | AOR <sub>CS</sub> | 95% CIs    | p-value | ARC       | ARI  | AOR <sub>CS</sub> | 95% CIs    | p-value | ARC       | ARI  | AOR <sub>CS</sub> | 95% CIs    | p-value |
| <b>Fever</b>                     |           |      |                   |            |         |           |      |                   |            |         |           |      |                   |            |         |
| Cluster distance to PHC (km)     |           |      |                   |            |         |           |      |                   |            |         |           |      |                   |            |         |
| <=5.0                            | 0.17      | 0.17 | 0.96              | 0.77, 1.19 | 0.696   | 0.16      | 0.18 | 1.14              | 0.94, 1.39 | 0.185   | 0.14      | 0.14 | 0.99              | 0.82, 1.20 | 0.916   |
| >5.0                             | 0.18      | 0.19 | 0.94              | 0.79, 1.11 | 0.449   | 0.19      | 0.17 | 0.85              | 0.72, 1.00 | 0.052   | 0.14      | 0.16 | 1.11              | 0.94, 1.29 | 0.211   |
| LRT                              |           |      |                   |            | 0.8685  |           |      |                   |            | 0.0252  |           |      |                   |            | 0.3802  |
| Cluster population size (people) |           |      |                   |            |         |           |      |                   |            |         |           |      |                   |            |         |
| <700                             | 0.18      | 0.18 | 0.95              | 0.77, 1.17 | 0.616   | 0.18      | 0.16 | 0.83              | 0.67, 1.02 | 0.082   | 0.15      | 0.15 | 0.97              | 0.79, 1.19 | 0.743   |
| =>700                            | 0.18      | 0.18 | 0.95              | 0.80, 1.13 | 0.553   | 0.17      | 0.18 | 1.04              | 0.89, 1.23 | 0.602   | 0.14      | 0.15 | 1.12              | 0.96, 1.30 | 0.140   |
| LRT                              |           |      |                   |            | 0.9855  |           |      |                   |            | 0.0902  |           |      |                   |            | 0.2613  |
| Household wealth                 |           |      |                   |            |         |           |      |                   |            |         |           |      |                   |            |         |
| Less poor                        | 0.19      | 0.18 | 0.96              | 0.83, 1.10 | 0.522   | 0.18      | 0.17 | 0.93              | 0.81, 1.06 | 0.292   | 0.14      | 0.15 | 1.06              | 0.93, 1.21 | 0.351   |
| Poorest                          | 0.17      | 0.16 | 0.89              | 0.70, 1.13 | 0.334   | 0.16      | 0.18 | 1.14              | 0.90, 1.43 | 0.275   | 0.15      | 0.15 | 1.04              | 0.83, 1.29 | 0.755   |
| LRT                              |           |      |                   |            | 0.5498  |           |      |                   |            | 0.0847  |           |      |                   |            | 0.8184  |
| <b>Diarrhoea</b>                 |           |      |                   |            |         |           |      |                   |            |         |           |      |                   |            |         |
| Cluster distance to PHC (km)     |           |      |                   |            |         |           |      |                   |            |         |           |      |                   |            |         |
| <=5.0                            | 0.24      | 0.24 | 1.03              | 0.85, 1.24 | 0.757   | 0.23      | 0.22 | 0.99              | 0.83, 1.19 | 0.947   | 0.22      | 0.22 | 0.98              | 0.82, 1.17 | 0.819   |
| >5.0                             | 0.24      | 0.24 | 0.99              | 0.85, 1.15 | 0.896   | 0.21      | 0.21 | 1.02              | 0.88, 1.19 | 0.792   | 0.21      | 0.21 | 1.01              | 0.87, 1.17 | 0.889   |
| LRT                              |           |      |                   |            | 0.7486  |           |      |                   |            | 0.8247  |           |      |                   |            | 0.7910  |
| Cluster population size (people) |           |      |                   |            |         |           |      |                   |            |         |           |      |                   |            |         |
| <700                             | 0.23      | 0.24 | 1.03              | 0.86, 1.25 | 0.738   | 0.23      | 0.21 | 0.86              | 0.72, 1.04 | 0.131   | 0.23      | 0.20 | 0.84              | 0.68, 1.00 | 0.045   |
| =>700                            | 0.25      | 0.24 | 0.99              | 0.85, 1.15 | 0.899   | 0.21      | 0.22 | 1.11              | 0.96, 1.27 | 0.163   | 0.20      | 0.22 | 1.11              | 0.97, 1.28 | 0.135   |
| LRT                              |           |      |                   |            | 0.7331  |           |      |                   |            | 0.0420  |           |      |                   |            | 0.0130  |
| Household wealth                 |           |      |                   |            |         |           |      |                   |            |         |           |      |                   |            |         |
| Less poor                        | 0.24      | 0.24 | 0.98              | 0.87, 1.10 | 0.720   | 0.22      | 0.22 | 1.01              | 0.90, 1.14 | 0.843   | 0.22      | 0.22 | 0.99              | 0.88, 1.12 | 0.908   |
| Poorest                          | 0.23      | 0.26 | 1.14              | 0.93, 1.39 | 0.220   | 0.21      | 0.21 | 1.00              | 0.81, 1.23 | 0.986   | 0.20      | 0.20 | 1.02              | 0.84, 1.25 | 0.838   |
| LRT                              |           |      |                   |            | 0.1441  |           |      |                   |            | 0.8949  |           |      |                   |            | 0.7869  |
| <b>Cough</b>                     |           |      |                   |            |         |           |      |                   |            |         |           |      |                   |            |         |
| Cluster distance to PHC (km)     |           |      |                   |            |         |           |      |                   |            |         |           |      |                   |            |         |
| <=5.0                            | 0.20      | 0.21 | 1.05              | 0.85, 1.30 | 0.648   | 0.20      | 0.21 | 1.10              | 0.89, 1.36 | 0.388   | 0.18      | 0.17 | 0.96              | 0.79, 1.16 | 0.659   |
| >5.0                             | 0.20      | 0.21 | 1.07              | 0.89, 1.27 | 0.472   | 0.21      | 0.20 | 0.95              | 0.80, 1.14 | 0.598   | 0.18      | 0.20 | 1.11              | 0.95, 1.30 | 0.192   |
| LRT                              |           |      |                   |            | 0.9173  |           |      |                   |            | 0.3163  |           |      |                   |            | 0.2434  |
| Cluster population size (people) |           |      |                   |            |         |           |      |                   |            |         |           |      |                   |            |         |
| <700                             | 0.21      | 0.21 | 1.00              | 0.81, 1.24 | 0.999   | 0.22      | 0.19 | 0.83              | 0.67, 1.03 | 0.093   | 0.17      | 0.20 | 1.23              | 1.00, 1.50 | 0.047   |
| =>700                            | 0.19      | 0.21 | 1.11              | 0.93, 1.33 | 0.233   | 0.19      | 0.21 | 1.15              | 0.97, 1.36 | 0.114   | 0.18      | 0.18 | 0.96              | 0.82, 1.12 | 0.580   |

|                                  |      |      |      |            |        |      |      |      |            |        |      |      |      |            |        |
|----------------------------------|------|------|------|------------|--------|------|------|------|------------|--------|------|------|------|------------|--------|
| LRT                              |      |      |      |            | 0.4460 |      |      |      |            | 0.0213 |      |      |      |            | 0.0566 |
| Household wealth                 |      |      |      |            |        |      |      |      |            |        |      |      |      |            |        |
| Less poor                        | 0.20 | 0.21 | 1.05 | 0.91, 1.20 | 0.532  | 0.20 | 0.21 | 1.01 | 0.88, 1.17 | 0.873  | 0.18 | 0.19 | 1.08 | 0.94, 1.23 | 0.270  |
| Poorest                          | 0.20 | 0.21 | 1.09 | 0.87, 1.36 | 0.465  | 0.20 | 0.20 | 1.02 | 0.82, 1.28 | 0.858  | 0.19 | 0.18 | 0.93 | 0.75, 1.14 | 0.481  |
| LRT                              |      |      |      |            | 0.7235 |      |      |      |            | 0.9355 |      |      |      |            | 0.1624 |
| Suspected pneumonia              |      |      |      |            |        |      |      |      |            |        |      |      |      |            |        |
| Cluster distance to PHC (km)     |      |      |      |            |        |      |      |      |            |        |      |      |      |            |        |
| <=5.0                            | 0.09 | 0.10 | 1.08 | 0.84, 1.38 | 0.554  | 0.08 | 0.09 | 1.15 | 0.88, 1.49 | 0.316  | 0.06 | 0.06 | 0.89 | 0.68, 1.18 | 0.425  |
| >5.0                             | 0.08 | 0.09 | 1.18 | 0.96, 1.46 | 0.124  | 0.08 | 0.08 | 0.96 | 0.77, 1.20 | 0.707  | 0.06 | 0.06 | 1.15 | 0.92, 1.44 | 0.229  |
| LRT                              |      |      |      |            | 0.5833 |      |      |      |            | 0.3134 |      |      |      |            | 0.1700 |
| Cluster population size (people) |      |      |      |            |        |      |      |      |            |        |      |      |      |            |        |
| <700                             | 0.09 | 0.10 | 1.17 | 0.90, 1.52 | 0.251  | 0.09 | 0.08 | 0.87 | 0.66, 1.16 | 0.353  | 0.06 | 0.07 | 1.10 | 0.82, 1.47 | 0.528  |
| =>700                            | 0.08 | 0.09 | 1.12 | 0.92, 1.37 | 0.264  | 0.08 | 0.09 | 1.13 | 0.92, 1.40 | 0.254  | 0.06 | 0.06 | 1.02 | 0.82, 1.26 | 0.883  |
| LRT                              |      |      |      |            | 0.8165 |      |      |      |            | 0.1523 |      |      |      |            | 0.6767 |
| Household wealth                 |      |      |      |            |        |      |      |      |            |        |      |      |      |            |        |
| Less poor                        | 0.08 | 0.09 | 1.12 | 0.94, 1.33 | 0.191  | 0.08 | 0.09 | 1.02 | 0.85, 1.22 | 0.808  | 0.06 | 0.06 | 1.04 | 0.86, 1.26 | 0.658  |
| Poorest                          | 0.09 | 0.10 | 1.13 | 0.85, 1.51 | 0.404  | 0.07 | 0.08 | 1.10 | 0.79, 1.51 | 0.577  | 0.06 | 0.06 | 0.98 | 0.72, 1.35 | 0.924  |
| LRT                              |      |      |      |            | 0.9454 |      |      |      |            | 0.6726 |      |      |      |            | 0.7299 |

Table S15: Heterogeneous treatment effects by cluster population size, cluster distance to nearest PHC, and household wealth for prevalence outcomes during the three-year trial period overall, controlling for the linear effect of time

| Outcome                 | ARC  | ARI  | OR <sub>CS</sub> | 95% CIs    | p-value | Outcome                 | ARC  | ARI  | OR <sub>CS</sub> | 95% CIs    | p-value |
|-------------------------|------|------|------------------|------------|---------|-------------------------|------|------|------------------|------------|---------|
| Fever                   |      |      |                  |            |         | Diarrhoea               |      |      |                  |            |         |
| Cluster distance to PHC |      |      |                  |            |         | Cluster distance to PHC |      |      |                  |            |         |
| <=5.0 km                | 0.16 | 0.16 | 1.01             | 0.88, 1.17 | 0.851   | <=5.0 km                | 0.23 | 0.23 | 1.01             | 0.87, 1.16 | 0.945   |
| >5.0 km                 | 0.18 | 0.17 | 0.95             | 0.84, 1.07 | 0.373   | >5.0 km                 | 0.22 | 0.22 | 0.99             | 0.88, 1.12 | 0.897   |
| LRT                     |      |      |                  |            | 0.4838  | LRT                     |      |      |                  |            | 0.8929  |
| Cluster population size |      |      |                  |            |         | Cluster population size |      |      |                  |            |         |
| <700 people             | 0.17 | 0.16 | 0.91             | 0.79, 1.05 | 0.178   | <700 people             | 0.23 | 0.22 | 0.91             | 0.79, 1.04 | 0.163   |
| =>700                   | 0.17 | 0.17 | 1.03             | 0.91, 1.16 | 0.634   | =>700                   | 0.22 | 0.23 | 1.07             | 0.95, 1.21 | 0.243   |
| LRT                     |      |      |                  |            | 0.1825  | LRT                     |      |      |                  |            | 0.0709  |
| Household wealth        |      |      |                  |            |         | Household wealth        |      |      |                  |            |         |
| Less poor               | 0.17 | 0.17 | 0.97             | 0.88, 1.06 | 0.471   | Less poor               | 0.23 | 0.23 | 0.99             | 0.90, 1.08 | 0.785   |
| Poorest quintile        | 0.16 | 0.16 | 1.00             | 0.87, 1.16 | 0.980   | Poorest quintile        | 0.21 | 0.22 | 1.04             | 0.90, 1.20 | 0.573   |
| LRT                     |      |      |                  |            | 0.6011  | LRT                     |      |      |                  |            | 0.4278  |
| Cough                   |      |      |                  |            |         | Suspected pneumonia     |      |      |                  |            |         |
| Cluster distance to PHC |      |      |                  |            |         | Cluster distance to PHC |      |      |                  |            |         |
| <=5.0 km                | 0.19 | 0.20 | 1.02             | 0.88, 1.18 | 0.820   | <=5.0 km                | 0.08 | 0.08 | 1.02             | 0.87, 1.20 | 0.830   |
| >5.0 km                 | 0.19 | 0.20 | 1.06             | 0.94, 1.19 | 0.335   | >5.0 km                 | 0.07 | 0.08 | 1.10             | 0.96, 1.25 | 0.177   |
| LRT                     |      |      |                  |            | 0.6675  | LRT                     |      |      |                  |            | 0.4889  |
| Cluster population size |      |      |                  |            |         | Cluster population size |      |      |                  |            |         |
| <700 people             | 0.20 | 0.20 | 1.00             | 0.87, 1.15 | 0.957   | <700 people             | 0.08 | 0.08 | 1.01             | 0.86, 1.19 | 0.908   |
| =>700                   | 0.19 | 0.20 | 1.08             | 0.96, 1.21 | 0.224   | =>700                   | 0.07 | 0.08 | 1.10             | 0.97, 1.25 | 0.130   |
| LRT                     |      |      |                  |            | 0.4542  | LRT                     |      |      |                  |            | 0.4007  |
| Household wealth        |      |      |                  |            |         | Household wealth        |      |      |                  |            |         |
| Less poor               | 0.19 | 0.20 | 1.05             | 0.95, 1.15 | 0.326   | Less poor               | 0.08 | 0.08 | 1.06             | 0.95, 1.18 | 0.279   |
| Poorest quintile        | 0.19 | 0.19 | 1.00             | 0.87, 1.15 | 0.977   | Poorest quintile        | 0.08 | 0.08 | 1.07             | 0.89, 1.28 | 0.498   |
| LRT                     |      |      |                  |            | 0.5022  | LRT                     |      |      |                  |            | 0.9728  |



Table S16: Per-protocol subgroup estimates for the prevalence outcomes, excluding observations in the intervention arm that did not receive at least two CHW home visits in the month preceding the survey, during the three-year trial period overall<sup>1</sup> and at each follow-up time-point<sup>2</sup>

| Outcome                               | ARC  | ARI  | AOR <sub>CS</sub><br>(C vs I) | 95% CIs    | p-value |
|---------------------------------------|------|------|-------------------------------|------------|---------|
| <b>Fever (N=33,838)</b>               |      |      |                               |            |         |
| Overall <sup>1</sup>                  | 0.17 | 0.17 | 1.04                          | 0.93, 1.15 | 0.551   |
| Time-point <sup>2</sup>               |      |      |                               |            |         |
| 12 months                             | 0.18 | 0.19 | 1.09                          | 0.95, 1.25 | 0.212   |
| 24 months                             | 0.18 | 0.18 | 0.96                          | 0.84, 1.10 | 0.563   |
| 36 months                             | 0.15 | 0.15 | 1.06                          | 0.91, 1.23 | 0.470   |
| Likelihood ratio test                 |      |      |                               |            | 0.2233  |
| <b>Diarrhoea (N=33,839)</b>           |      |      |                               |            |         |
| Overall <sup>1</sup>                  | 0.23 | 0.23 | 1.03                          | 0.94, 1.14 | 0.491   |
| Time-point <sup>2</sup>               |      |      |                               |            |         |
| 12 months                             | 0.24 | 0.26 | 1.14                          | 1.00, 1.29 | 0.042   |
| 24 months                             | 0.22 | 0.22 | 0.99                          | 0.87, 1.12 | 0.842   |
| 36 months                             | 0.22 | 0.21 | 0.97                          | 0.84, 1.11 | 0.623   |
| Likelihood ratio test                 |      |      |                               |            | 0.0558  |
| <b>Cough (N=33,848)</b>               |      |      |                               |            |         |
| Overall <sup>1</sup>                  | 0.19 | 0.20 | 1.07                          | 0.96, 1.19 | 0.245   |
| Time-point <sup>2</sup>               |      |      |                               |            |         |
| 12 months                             | 0.19 | 0.22 | 1.23                          | 1.07, 1.41 | 0.004   |
| 24 months                             | 0.20 | 0.21 | 1.01                          | 0.88, 1.16 | 0.849   |
| 36 months                             | 0.19 | 0.18 | 0.96                          | 0.83, 1.11 | 0.546   |
| Likelihood ratio test                 |      |      |                               |            | 0.0027  |
| <b>Suspected pneumonia (N=33,822)</b> |      |      |                               |            |         |
| Overall <sup>1</sup>                  | 0.08 | 0.08 | 1.10                          | 0.98, 1.23 | 0.106   |
| Time-point <sup>2</sup>               |      |      |                               |            |         |
| 12 months                             | 0.08 | 0.10 | 1.21                          | 1.03, 1.41 | 0.017   |
| 24 months                             | 0.08 | 0.09 | 1.09                          | 0.93, 1.28 | 0.280   |
| 36 months                             | 0.06 | 0.06 | 0.94                          | 0.78, 1.14 | 0.547   |
| Likelihood ratio test                 |      |      |                               |            | 0.0920  |

Table S17: Per-protocol subgroup estimates for the prevalence outcomes, excluding observations in the intervention arm that did not receive at least two CHW home visits as well as observations in the control arm that received any CHW home visit in the month preceding the survey, during the three-year trial period overall<sup>1</sup> and at each follow-up time-point<sup>2</sup>

| Outcome                               | ARC  | ARI  | AOR <sub>CS</sub><br>(C vs I) | 95% CIs    | p-value |
|---------------------------------------|------|------|-------------------------------|------------|---------|
| <b>Fever (N=28,848)</b>               |      |      |                               |            |         |
| Overall <sup>1</sup>                  | 0.17 | 0.17 | 1.04                          | 0.93, 1.16 | 0.483   |
| Time-point <sup>2</sup>               |      |      |                               |            |         |
| 12 months                             | 0.18 | 0.19 | 1.12                          | 0.97, 1.29 | 0.115   |
| 24 months                             | 0.18 | 0.18 | 0.95                          | 0.83, 1.09 | 0.482   |
| 36 months                             | 0.15 | 0.15 | 1.06                          | 0.91, 1.23 | 0.448   |
| Likelihood ratio test                 |      |      |                               |            | 0.1164  |
| <b>Diarrhoea (N=28,850)</b>           |      |      |                               |            |         |
| Overall <sup>1</sup>                  | 0.22 | 0.23 | 1.04                          | 0.94, 1.15 | 0.499   |
| Time-point <sup>2</sup>               |      |      |                               |            |         |
| 12 months                             | 0.24 | 0.26 | 1.16                          | 1.02, 1.32 | 0.028   |
| 24 months                             | 0.22 | 0.22 | 0.99                          | 0.87, 1.13 | 0.893   |
| 36 months                             | 0.22 | 0.21 | 0.95                          | 0.83, 1.09 | 0.479   |
| Likelihood ratio test                 |      |      |                               |            | 0.0262  |
| <b>Cough (N=28,859)</b>               |      |      |                               |            |         |
| Overall <sup>1</sup>                  | 0.19 | 0.20 | 1.08                          | 0.96, 1.21 | 0.180   |
| Time-point <sup>2</sup>               |      |      |                               |            |         |
| 12 months                             | 0.19 | 0.22 | 1.26                          | 1.09, 1.45 | 0.002   |
| 24 months                             | 0.20 | 0.21 | 1.04                          | 0.90, 1.20 | 0.617   |
| 36 months                             | 0.19 | 0.18 | 0.95                          | 0.82, 1.10 | 0.482   |
| Likelihood ratio test                 |      |      |                               |            | 0.0013  |
| <b>Suspected pneumonia (N=28,833)</b> |      |      |                               |            |         |
| Overall <sup>1</sup>                  | 0.07 | 0.08 | 1.11                          | 0.98, 1.23 | 0.103   |
| Time-point <sup>2</sup>               |      |      |                               |            |         |
| 12 months                             | 0.08 | 0.10 | 1.22                          | 1.03, 1.46 | 0.023   |
| 24 months                             | 0.08 | 0.09 | 1.10                          | 0.93, 1.31 | 0.275   |
| 36 months                             | 0.06 | 0.06 | 0.97                          | 0.79, 1.20 | 0.795   |
| Likelihood ratio test                 |      |      |                               |            | 0.1610  |

## **Reflexivity Statement**

### **Study conceptualisation**

#### **1. How does this study address local research and policy priorities?**

The trial's research questions and outcomes were chosen in consultation with Mali's Ministry of Health and Social Affairs to answer questions of key concern as they develop and implement national health policies. How to optimise community health worker service delivery in rural Mali to reduce child death and improve access to essential services is a key local policy question. We assessed heterogeneous treatment effects by potential modifiers that are relevant to the country's community health strategy, including cluster population size, distance to health center, and household wealth. We also embedded a costing analysis into the trial because whether the intervention would be affordable at scale was a key concern of the government.

#### **2. How were local researchers involved in study design?**

Malian authors KK, DD, and MG were involved in study design.

DD (LMIC researcher) and AJ (HIC researcher) are founding members of Muso, and initially designed and tested the proactive CHW home visit intervention in Bamako, Mali. Following promising observational results in this peri-urban context, DD and AJ and the Ministry of Health and Social Affairs sought to implement and test the intervention next in a rural Malian context and, specifically, isolate and evaluate the effects of CHW home visits from the other health system enabling co-interventions (professional CHWs, upgraded primary care clinics, user fee removal).

MG is the chief doctor at the Bankass referral hospital. He selected and prepared the study sites in collaboration with Muso's Amadou Beydi Cissé (Malian researcher) who is an author on the trial's primary under-five mortality outcome paper (submitted) and is acknowledged in this paper.

KK was brought on board to pursue the trial as one of three co-PIs and the founding director the Muso's research department. He was assisted by Dr Belco Poudiougou (Malian researcher) who passed away in 2017 and is recognised posthumously in the acknowledgements.

### **Research management**

#### **3. How has funding been used to support the local research team(s)?**

Muso received unrestricted and restricted funding to support this trial, which paid the salaries or consultant fees of both LMIC and HIC research team members. Fee support levels were set to comply with the salary scales of the academic researcher's institution, prorated to the time contributed to the trial. We acknowledge the considerable discrepancy between the salaries and/or consultancy fees benchmarked in LMICs versus HICs.

## **Data acquisition and analysis**

### **4. How are research staff who conducted data collection acknowledged?**

NK and MBT (Malian researchers) are acknowledged in third and fifth authorship positions, respectively. They supervised data collection teams (of 120 surveyors total) at every annual survey round, from baseline, beginning in December 2016, to year three, ending in April 2020. Other Malian research staff who supervised data collection teams or coordinated field activities during a portion of the trial period, such as Belco Poudiougou, Yacouba Samaké, Mahamadou Sogoba, and Saibou Doumbia, are recognised in the acknowledgements of this paper and as authors on other trial papers (submitted or drafting) that are aligned with their interests and contributions to the trial.

### **5. How have members of the research partnership been provided with access to study data?**

All research partners who were involved in data quality assurance/quality control, cleaning, management, preparation, and analysis had access to study data.

During the trial period, Muso built a data warehouse. Now that survey data sets have been fully cleaned and locked, we are uploading them to the data warehouse so that all research partners with authorised access can more readily access and extract data for their planned and exploratory analyses.

### **6. How were data used to develop analytical skills within the partnership?**

For this secondary trial endpoint paper, an early career researcher CW developed her analytical skills in writing the statistical plan and executing the analysis under the guidance of her more senior statistical advisor, CL (HIC researcher). CW is a HIC researcher (from a HIC and affiliated with a HIC university as a PhD candidate) and has been based in Mali since 2015 when the trial was designed. For the primary under-five mortality outcome, a HIC post-doctoral early career researcher (ET) was given the lead in planning and executing the analysis under the mentorship of her more senior HIC advisor (JL).

We acknowledge that precedence has been given to HIC researchers over LMIC researchers when it comes to conducting the analyses of prespecified primary and priority secondary trial outcomes, such as this one. When the consortium was first established, HIC (affiliated and/or based) researchers were recruited as trial statisticians, due (at least in part) to the systemic privilege that grants them preferential access to resources, such as training, mentorship, and time, required to analyse trial data.

However, there are currently 20 trial analyses/papers planned by the consortium, including other secondary endpoints, nested/sub-studies, and exploratory or secondary data analyses. These are in various phases of development, from conception to data preparation, analysis, drafting, or

submitting. Early career Malian researchers, including NK and MBT, are leading analyses and/or contributing important analytical portions to these works in progress.

Furthermore, Malian researchers led data quality assurance/quality control throughout the trial, developing their skills in this area. Malian data managers at different points during the trial, such as Idrissa Kamara, Lamine Guindo, Mahamadou Sylla, are recognised in the acknowledgements of this paper and as authors on other trial papers (submitted or drafting) that are aligned with their interests and contributions to the trial.

## **Data interpretation**

### **7. How have research partners collaborated in interpreting study data?**

We convened workshops with various stakeholder groups, to present and discuss/interpret results, virtually or in person, in French. The trial primary and secondary outcome results, including those reported in this paper, were presented and discussed in group with: the Muso leadership team (virtual); the Muso research department (virtual); the entire Muso team (virtual); district level health and political authorities (in person); and community representatives separately per health catchment area (in person). Community representatives included village chiefs and their advisors, women's and youth association leaders, religious leaders, local political and health authorities, study CHWs, and dedicated CHW supervisors. With Ministry of Health and Social Affairs research partners and authors (MC, MB, MG), we held one-on-one in person meetings to discuss and interpret results. For this secondary trial endpoint analysis/paper, the lead analyst/author (CW) held an additional authors contribution focus group with DD, NK, and MBT to discuss and interpret results in depth.

All drafts were circulated to all Malian authors in French, using a free online translation tool. Their input, in French, was solicited verbally, through comments/annotations, or via direct writing, on specific questions specially articulated/highlighted given their expertise, as well as more generally.

## **Drafting and revising for intellectual content**

### **8. How were research partners supported to develop writing skills?**

For this secondary trial endpoint paper, we used translation, virtual, verbal, and written methods to contribute to writing, as described in #7. Malian authors were invited to write sub-sections, with a focus on the methods and discussion.

Similar to what is described in #6, this is one paper of many related to this trial. Malian researchers are leading and will lead the writing on other forthcoming papers. For example, NK is leading a complementary paper examining changes in reported barriers to care for sick children across arms compared to baseline.

### **9. How will research products be shared to address local needs?**

In collaboration with Muso's technical assistance department and our ministry partners, we will work to facilitate the process of translating trial findings to action and policy recommendations for Mali's community health plan. For one, we will write and share policy memos (in French and English) to accompany the scientific publications.

Our Mali dissemination plan, developed with our Ministry of Health and Social Affairs authors (MC, MB), began with the local and district level dissemination workshops described in #7. Next, we will support the Bankass district health and political authorities to present the results at regional level workshops, with the Regional Health Directorate and its partners in health planning and implementation in Mopti. Next, the regional health and political authorities will present the results at national level workshops, with governmental and non-governmental stakeholders and coalitions making decisions about community health in Mali. These workshops will enable local policy leaders to integrate the study findings to guide the implementation of Mali's national community health strategy and health system strengthening efforts.

We have started the process of identifying francophone conferences/symposia in Mali and the West African region but need to renew our efforts to select and submit trial results to these fora. We will also consider which trial papers to submit for publication in African regional journals.

## **Authorship**

### **10. How is the leadership, contribution and ownership of this work by LMIC researchers recognised within the authorship?**

Half (7 out of 14) of the authors on this paper are Malian (LMIC) researchers, and the other half are HIC researchers. The second and third authors are Malian (LMIC) researchers.

KK (a male, senior, LMIC researcher, based in Mali) and AJ (a male, senior, HIC researcher, based in USA) are trial co-PIs. On the trial's primary under-five mortality outcome paper (submitted), they are co-senior authors to reflect this. However, in KK's West African francophone academic environment, it is preferential to be among the first three authors rather than the senior, co-senior, or penultimate author. Thus, KK is second author on this paper, after CW (a female, early career, HIC researcher, based in Mali) in the first position who led this analysis and writing.

KK is followed by NK (a female, early career, Malian researcher) in the third authorship position, to recognise her invaluable contributions to data acquisition, including supervising data collection and participating in data quality assurance/quality control, cleaning, and management.

Three Ministry of Health and Social Affairs partners (MC, MB, MG) are recognised as middle authors to recognise their role as co-owners of this research and their involvement in intervention oversight and the interpretation of results.

### **11. How have early career researchers across the partnership been included within the authorship team?**

Early career researchers have been given prominently places in the author list, including the first (CW), third (NK), and co-senior positions (ET).

An early career, female, HIC researcher was given the lead on this secondary trial endpoint analysis and is the first author (CW). She was based in Mali throughout the trial, with periods in the UK where she is affiliated with LSHTM as a PhD student. Her PhD advisory committee members are included among the authors on this particular trial paper (KK, AJ, BG, DC, CL). Other early career researchers are included among the authors, including two Malian researchers (NK, MBT).

## **12. How has gender balance been addressed within the authorship?**

Five out of the 14 authors are female (CW, ET, NK, JL, CL), including the first, co-senior, and penultimate senior authors who led the analytical work for this paper. We recognise that only one female author is Malian (NK).

## **Training**

### **13. How has the project contributed to training of LMIC researchers?**

This is one of the world's largest trials in community health. Being a partner in this research provided great professional development for LMIC and HIC researchers alike.

The trial provided on-the-job training of Malian researchers in survey development, good clinical practice and research ethics, data collection and quality assurance/quality control, and data cleaning and management. We acknowledge that we are in the early stages of leveraging the trial to contribute more to the training of Malian researchers in data analysis and paper writing. This includes research question generation and protocol writing, for secondary analyses of trial data. Furthermore, trial collaborators who participated in intervention implementation, such as CHWs and programme managers, supervisors, or administrators could have participated more fully in the research process had the project contributed more to their training in the fundamentals of research methods and data.

Muso has provided funding for LMIC (and HIC) researchers to pursue professional development opportunities such as international conferences attendance and higher education degrees, including in statistical analysis.

## **Infrastructure**

### **14. How has the project contributed to improvements in local infrastructure?**

Since the trial was designed, Muso's research department has grown to what is today 13 West and Central African research investigators and evaluators.

Muso has continued and will continue to support the Ministry of Health and Social Affairs in implementing the co-interventions across both arms, including 8 refurbished and reinforced

primary care clinics (including one pilot area), 168 professionalised CHWs and their 10 dedicated supervisors, and user fee removal, beyond the end of the trial.

## **Governance**

### **15. What safeguarding procedures were used to protect local study participants and researchers?**

Within each catchment area, we held public consultation meetings with community representatives, including village chiefs and their advisors, women's and youth association leaders, religious leaders, and politico-administrative authorities (such as mayors, PHC directors, and Community Health Associations), where we discussed and obtained verbal permission to conduct the trial.

When violent conflict arrived in the study area, a detailed security plan established protections, contingencies, and continuity of services to protect study participants, providers, and researchers from the dangers of conflict. We also adapted health-care delivery and research survey procedures to protect health and safety throughout the Covid-19 pandemic.

The ProCCM Trial engaged three different oversight bodies to protect study participants: the local ethics committee in Bamako, an independent clinical research associate from Senegal, and a data safety and monitoring board, which included a senior Malian researcher. All survey respondents provided written, informed consent or assent at their first enrolment. Any individual, regardless of residency, survey enrolment, or arm assignment, who sought care from study providers was eligible to receive health-care throughout the trial.

We held fortnightly consortium meetings throughout the trial period. These were conducted primarily in English, which is the first language of the HIC researchers and the third language of the Malian researchers. As a result, HIC (based/affiliated) researchers in the partnership tended to be overrepresented in the consortium meetings and likely more comfortable speaking. We acknowledge that there is improvement to be made in the equity, diversity, and inclusion of participation at research consortium meetings.
